# Supplementary material for: The prognostic significance of DAPK1 in bladder cancer
Source: PLoS One. 2017 Apr 7;12(4):e0175290. doi: 10.1371/journal.pone.0175290 (PMC5384764; doi:10.1371/journal.pone.0175290)
Supplement: S3 Table — (XLSX) [file pone.0175290.s004.xlsx]

## Sheet: DAPK1-n14.sig.sscmap
uniqueID	setsize	tables_count	DAPK1-n14.sig.sscmap.tab_setcscore	DAPK1-n14.sig.sscmap.tab_setpvalue	DAPK1-n14.sig.sscmap.tab_setzscore=setcscore/stdev	DAPK1-n14.sig.sscmap.tab_significance_mark	Perturb_stability
BRD-K75089421__pronestyl__trt_cp	45	2	-0.150538	6.67466e-09	-5.68153	1	1
BRD-K50859149__sulfisoxazole__trt_cp	125	2	-0.0765547	1.43841e-06	-4.67942	1	1
BRD-K42098891__Protriptyline hydrochloride__trt_cp	11	2	-0.210699	3.41265e-06	-4.49907	1	1
BRD-K56343971__PLX4032_RG7204, R7204, RO5185426,__trt_cp	179	2	-0.0869699	9.93467e-05	-3.72067	1	1
BRD-K78010432__Furosemide__trt_cp	10	2	-0.195013	0.000124948	-3.66237	1	1
BRD-K51350053__toremifene__trt_cp	84	2	-0.0892056	0.000242216	-3.48922	1	1
BRD-K46211610__priscoline__trt_cp	45	2	-0.100998	0.000132421	-3.64746	1	0.933333
BRD-K81272440__dantrolene__trt_cp	82	2	-0.069514	0.000155626	-3.60575	1	0.933333
BRD-K12343256__JTP-74057;GSK1120212;GSK-1120212__trt_cp	133	2	-0.138785	0.000110454	-3.69382	1	0.866667
BRD-K58662656__Cefepime hydrochloride__trt_cp	11	2	-0.195513	0.000156608	-3.60412	1	0.8
BRD-A09056319__ALFLUZOSIN__trt_cp	46	2	-0.0859058	0.000465776	-3.31042	1	0.8
BRD-A60217728__Iohexol__trt_cp	12	2	-0.15381	0.00042373	-3.33681	1	0.733333
BRD-A13946108__sulindac__trt_cp	68	2	-0.0675309	0.000183764	-3.56237	1	0.666667
BRD-K04804440__Ciprofloxacin hydrochloride monohydrate__trt_cp	10	2	-0.17846	0.000202528	-3.53677	1	0.6
BRD-K22662435__ganciclovir__trt_cp	56	2	-0.0794439	0.000611708	-3.23336	1	0.533333
BRD-K07612980__Sparfloxacin__trt_cp	11	2	-0.172859	0.000443105	-3.32436	1	0.466667
BRD-A36217750__SULFINPYRAZONE__trt_cp	106	2	-0.0480374	0.000674832	-3.2052	1	0.4
BRD-K36627727__tamibarotene__trt_cp	24	2	-0.153584	0.00177311	-2.91594	0	0.333333
BRD-A76019558__ketoconazole__trt_cp	44	2	-0.102324	0.000992387	-3.0925	0	0.2
BRD-K57886322__fluocinolone acetonide 21-acetate__trt_cp	44	2	-0.0794675	0.00139058	-2.99094	0	0.2
BRD-A04553218__Chlorpheniramine maleate__trt_cp	10	2	-0.145962	0.00233383	-2.82912	0	0.133333
BRD-A75726477__Clenbuterol hydrochloride__trt_cp	9	2	-0.160859	0.00159811	-2.94821	0	0.0666667
BRD-K55044200__Amoxicillin__trt_cp	10	2	-0.157036	0.00162554	-2.94294	0	0.0666667
BRD-A03216249__Mepivacaine hydrochloride__trt_cp	11	2	-0.138249	0.00172009	-2.9254	0	0.0666667
BRD-A65013509__oxybutynin__trt_cp	45	2	-0.0661817	0.00262459	-2.79133	0	0.0666667
BRD-K79602928__Metformin.HCl__trt_cp	23	2	-0.109813	0.00266013	-2.78698	0	0.0666667
BRD-K11129031__GEMFIBROZIL__trt_cp	176	2	-0.0438493	0.00269739	-2.78246	0	0.0666667
BRD-A97437073__Rosiglitazone maleate__trt_cp	23	2	-0.0923632	0.0027666	-2.77423	0	0.0666667
BRD-K07208025__Trimethoprim__trt_cp	10	2	-0.132647	0.00310223	-2.73678	0	0.0666667
BRD-K95773607__Darifenacin hydrobromide__trt_cp	11	2	-0.148418	0.00124911	-3.02356	0	0
BRD-K54416256__methimazole__trt_cp	56	2	-0.0650583	0.00165701	-2.937	0	0
BRD-M56587789__Ibutilide fumarate__trt_cp	12	2	-0.153419	0.00176042	-2.91818	0	0
BRD-A20239487__atenolol__trt_cp	45	2	-0.0593127	0.00195732	-2.88496	0	0
BRD-A51382177__fosinopril__trt_cp	45	2	-0.0736572	0.00231891	-2.83117	0	0
BRD-K50938287__Sumatriptan succinate__trt_cp	12	2	-0.116852	0.0024054	-2.81944	0	0
BRD-K70592963__Phenindione__trt_cp	12	2	-0.118194	0.002506	-2.80626	0	0
BRD-K87024524__phenelzine__trt_cp	81	2	-0.0547704	0.00253029	-2.80315	0	0
BRD-K43887077__intropin__trt_cp	44	2	-0.086099	0.00316875	-2.72979	0	0
BRD-K89055274__Alverine citrate salt__trt_cp	10	2	-0.136163	0.0035741	-2.68986	0	0
BRD-K08806317__timolol__trt_cp	37	2	-0.0792389	0.00367043	-2.68097	0	0
BRD-K37249724__Astemizole__trt_cp	10	2	-0.154486	0.00378465	-2.6707	0	0
BRD-K09471561__levofloxacin__trt_cp	37	2	-0.0762518	0.00394903	-2.6564	0	0
BRD-K60762818__DESIPRAMINE HYDROCHLORIDE__trt_cp	57	2	-0.07082	0.00428756	-2.62854	0	0
BRD-K47639036__Flavoxate hydrochloride__trt_cp	37	2	-0.0762987	0.00506207	-2.57156	0	0
BRD-K38310698__Troleandomycin__trt_cp	10	2	-0.152845	0.00509043	-2.56962	0	0
BRD-K71879491__tretinoin__trt_cp	210	2	-0.0565861	0.00553298	-2.54061	0	0
BRD-K32821942__azathioprine__trt_cp	82	2	-0.0568395	0.00615078	-2.50337	0	0
BRD-A22032524__amlodipine__trt_cp	46	2	-0.0886216	0.00638219	-2.49028	0	0
BRD-K85119730__tolbutamide__trt_cp	118	2	-0.0386565	0.00650995	-2.48322	0	0
BRD-K97810537__beclomethasone__trt_cp	45	2	-0.0679439	0.00675417	-2.47008	0	0
BRD-A55272860__Sulpiride__trt_cp	10	2	-0.118464	0.00718295	-2.44798	0	0
BRD-K35559145__levomepromazine__trt_cp	38	2	-0.0669567	0.00759954	-2.4276	0	0
BRD-K26739552__Fenspiride hydrochloride__trt_cp	10	2	-0.118415	0.00782056	-2.41718	0	0
BRD-K10995081__PERPHENAZINE__trt_cp	137	2	-0.0606725	0.00787284	-2.41476	0	0
BRD-K87226815__d-cycloserine__trt_cp	93	2	-0.0432256	0.00787639	-2.41459	0	0
BRD-K40831222__Moxalactam disodium salt__trt_cp	11	2	-0.136476	0.0078823	-2.41432	0	0
BRD-K03012696__Cefdinir__trt_cp	11	2	-0.134639	0.00868378	-2.37883	0	0
BRD-K11905747__Spectinomycin dihydrochloride__trt_cp	11	2	-0.112317	0.00868987	-2.37857	0	0
BRD-K47832606__Floxuridine__trt_cp	11	2	-0.12072	0.00893711	-2.36821	0	0
BRD-K36927236__glyburide__trt_cp	87	2	-0.0486389	0.00999021	-2.32672	0	0
BRD-K43860855__iobenguane__trt_cp	37	2	-0.0713494	0.0100106	-2.32595	0	0
BRD-K39188321__betamethasone__trt_cp	65	2	-0.0580899	0.0101733	-2.31989	0	0
BRD-K98530306__1h-imidazol-2-amine, n-(2,6-dichlorophenyl)-4,5-dihydro- [cas]__trt_cp	36	2	-0.0734777	0.0102037	-2.31877	0	0
BRD-M35773784__Atropine sulfate monohydrate__trt_cp	12	2	-0.113925	0.010234	-2.31766	0	0
BRD-K93433262__alfacalcidol__trt_cp	45	2	-0.0643863	0.0104926	-2.30825	0	0
BRD-K55301415__abiraterone__trt_cp	45	2	-0.053335	0.0106537	-2.30249	0	0
BRD-K14177560__Ethynodiol diacetate__trt_cp	10	2	-0.124618	0.0109685	-2.29146	0	0
BRD-A42167015__Carteolol hydrochloride__trt_cp	39	2	-0.0617461	0.0113397	-2.27879	0	0
BRD-A99117172__Hydroxychloroquine__trt_cp	23	2	-0.0879771	0.0116413	-2.26877	0	0
BRD-K83257731__Chloropyramine hydrochloride__trt_cp	11	2	-0.0980799	0.0121495	-2.25237	0	0
BRD-A75479906__flumadine__trt_cp	45	2	-0.0515541	0.0125279	-2.24054	0	0
BRD-K74117820__nelfinavir__trt_cp	36	2	-0.0848568	0.0137564	-2.20416	0	0
BRD-K82225283__Isosorbide mononitrate__trt_cp	11	2	-0.11081	0.0137665	-2.20388	0	0
BRD-A07765530__(+_-)-epinephrine__trt_cp	45	2	-0.0590131	0.0138001	-2.20292	0	0
BRD-K70976396__cefoxitin__trt_cp	45	2	-0.0506312	0.014822	-2.17481	0	0
BRD-K48168960__propylthiouracil__trt_cp	100	2	-0.0425837	0.0150353	-2.16916	0	0
BRD-K24023109__(+)-cis-diltiazem__trt_cp	88	2	-0.0450839	0.0153024	-2.16217	0	0
BRD-A08660406__Iodixanol__trt_cp	11	2	-0.100164	0.0157239	-2.15136	0	0
BRD-K24616672__Procaine hydrochloride__trt_cp	10	2	-0.113514	0.0163576	-2.13556	0	0
BRD-A07440155__labetalol__trt_cp	45	2	-0.0506943	0.0169332	-2.12166	0	0
BRD-K30649484__Mafenide hydrochloride__trt_cp	10	2	-0.114309	0.01833	-2.08953	0	0
BRD-K65544384__Aminohippuric acid__trt_cp	11	2	-0.117753	0.0189203	-2.07658	0	0
BRD-K28183345__proguanil__trt_cp	36	2	-0.0569073	0.0196571	-2.06088	0	0
BRD-K30685142__Thyroxine (L)__trt_cp	12	2	-0.104875	0.0196817	-2.06037	0	0
BRD-K74763371__bosentan__trt_cp	55	2	-0.0503798	0.0200195	-2.05335	0	0
BRD-K04196797__trileptal__trt_cp	36	2	-0.0632465	0.0211186	-2.03117	0	0
BRD-K28183345__Proguanil hydrochloride__trt_cp	11	2	-0.0883209	0.0213983	-2.02569	0	0
BRD-K78126613__SA83006__trt_cp	40	2	-0.0825276	0.0218051	-2.01782	0	0
BRD-K93461745__buspar__trt_cp	45	2	-0.0505333	0.0230643	-1.99421	0	0
BRD-A34006693__Suprofen__trt_cp	11	2	-0.0941599	0.0241002	-1.9756	0	0
BRD-A50157456__terbutaline__trt_cp	45	2	-0.0680242	0.0248897	-1.96185	0	0
BRD-K67511046__naloxone__trt_cp	45	2	-0.0453053	0.0249085	-1.96153	0	0
BRD-K09859624__methantheline__trt_cp	36	2	-0.0601476	0.0254706	-1.95197	0	0
BRD-A19736161__Ondansetron Hydrochloride__trt_cp	63	2	-0.0428463	0.0278864	-1.91281	0	0
BRD-K89152108__LIOTHYRONINE (L- isomer) SODIUM__trt_cp	53	2	-0.0518815	0.0284512	-1.90406	0	0
BRD-K70487031__flupentixol__trt_cp	37	2	-0.0649482	0.0287091	-1.90011	0	0
BRD-K90885812__pro-banthine__trt_cp	45	2	-0.0751372	0.0290586	-1.89481	0	0
BRD-K28667793__pyrazinamide__trt_cp	97	2	-0.0405624	0.0290985	-1.89421	0	0
BRD-K68867920__QUETIAPINE__trt_cp	119	2	-0.0397816	0.0300052	-1.88072	0	0
BRD-K66615216__Moxifloxacin__trt_cp	11	2	-0.0994318	0.0311681	-1.8639	0	0
BRD-A17828570__Fulvestrant__trt_cp	10	2	-0.110851	0.0319696	-1.8526	0	0
BRD-A75935363__Atracurium besylate__trt_cp	10	2	-0.106957	0.0320498	-1.85149	0	0
BRD-K06557128__voriconazole__trt_cp	48	2	-0.045278	0.0327303	-1.8421	0	0
BRD-K70778732__TRAZODONE HYDROCHLORIDE__trt_cp	57	2	-0.0362171	0.0331094	-1.83694	0	0
BRD-K98763141__niflumic-acid__trt_cp	45	2	-0.0400818	0.0337237	-1.82868	0	0
BRD-K08619574__Thioproperazine dimesylate__trt_cp	37	2	-0.0550228	0.0344707	-1.8188	0	0
BRD-K61250553__Loperamide.HCl__trt_cp	23	2	-0.0788806	0.0359238	-1.80008	0	0
BRD-K28346421__rifapentine__trt_cp	46	2	-0.0486061	0.0367462	-1.78976	0	0
BRD-K82036761__SERTRALINE HYDROCHLORIDE__trt_cp	46	2	-0.0719592	0.0370944	-1.78545	0	0
BRD-K71499074__Dichlorphenamide__trt_cp	44	2	-0.0454776	0.0371724	-1.78449	0	0
BRD-K54529596__captopril__trt_cp	99	2	-0.0343607	0.0374483	-1.7811	0	0
BRD-K99621550__TUBOCURARINE CHLORIDE__trt_cp	46	2	-0.0435866	0.0406527	-1.74316	0	0
BRD-A56470328__Fludrocortisone acetate__trt_cp	10	2	-0.0966313	0.0407502	-1.74205	0	0
BRD-K15502390__nevirapine__trt_cp	44	2	-0.0514247	0.0411726	-1.73724	0	0
BRD-K75527158__Alendronate sodium__trt_cp	12	2	-0.092978	0.0414771	-1.7338	0	0
BRD-K82357231__Desloratadine__trt_cp	11	2	-0.0947047	0.0416598	-1.73174	0	0
BRD-K99300445__Antazoline hydrochloride__trt_cp	10	2	-0.0835908	0.0425901	-1.72139	0	0
BRD-K91601245__mercaptopurine__trt_cp	44	2	-0.0560428	0.0426918	-1.72027	0	0
BRD-K97799481__theophylline__trt_cp	89	2	-0.03481	0.0428734	-1.71827	0	0
BRD-K76723084__isotretinoin__trt_cp	45	2	-0.0534494	0.0437968	-1.70823	0	0
BRD-K04185004__oxybuprocaine__trt_cp	38	2	-0.0480094	0.0439341	-1.70675	0	0
BRD-K13356952__methazolamide__trt_cp	55	2	-0.0473196	0.0443317	-1.70249	0	0
BRD-K11905747__spectinomycin__trt_cp	45	2	-0.042637	0.0445441	-1.70023	0	0
BRD-A55815733__phylloquinone__trt_cp	45	2	-0.0476481	0.0454407	-1.69077	0	0
BRD-K20075662__Betazole hydrochloride__trt_cp	10	2	-0.0839759	0.0457261	-1.68779	0	0
BRD-K67977190__eprosartan__trt_cp	45	2	-0.0380174	0.0467353	-1.67737	0	0
BRD-K15262564__mupirocin__trt_cp	45	2	-0.0673224	0.0472398	-1.67223	0	0
BRD-K89997465__Sonazine__trt_cp	134	2	-0.0318024	0.0490395	-1.65424	0	0
BRD-K89923877__Scopolamine hydrochloride__trt_cp	44	2	-0.0407605	0.0495872	-1.64887	0	0
BRD-K74141488__Naftifine hydrochloride__trt_cp	32	2	-0.0493305	0.0497868	-1.64692	0	0
BRD-K13044802__Ciclopirox ethanolamine__trt_cp	12	2	-0.106362	0.0512178	-1.63316	0	0
BRD-K10706131__Rivastigmine__trt_cp	11	2	-0.0853165	0.0512179	-1.63316	0	0
BRD-K19687926__GW-572016_Lapatinib,Tykerb__trt_cp	178	2	-0.0419286	0.0522693	-1.62324	0	0
BRD-K19687926__HY-50898__trt_cp	66	2	-0.0351528	0.052286	-1.62308	0	0
BRD-K85307935__Novobiocin sodium salt__trt_cp	11	2	-0.0812462	0.0537119	-1.60988	0	0
BRD-A53952395__Prilocaine hydrochloride__trt_cp	10	2	-0.0775341	0.0538973	-1.60819	0	0
BRD-K19352500__prochlorperazine__trt_cp	36	2	-0.0521382	0.0539978	-1.60727	0	0
BRD-K67017579__CILOSTAZOL__trt_cp	95	2	-0.0288415	0.0540205	-1.60706	0	0
BRD-K06335600__tizanidine__trt_cp	43	2	-0.0499501	0.0547833	-1.60014	0	0
BRD-K35960502__SA1444057__trt_cp	31	2	-0.0795377	0.0559654	-1.58957	0	0
BRD-A40639672__KETOROLAC TROMETHAMINE__trt_cp	57	2	-0.0353199	0.0569376	-1.58101	0	0
BRD-K20338176__Cefaclor hydrate__trt_cp	12	2	-0.0781454	0.0576007	-1.57524	0	0
BRD-K35520305__Dacarbazine__trt_cp	12	2	-0.0808174	0.0583362	-1.5689	0	0
BRD-A37288617__Amfepramone hydrochloride__trt_cp	10	2	-0.093891	0.0585363	-1.56718	0	0
BRD-K89997465__CHLORPROMAZINE__trt_cp	86	2	-0.0480689	0.0606924	-1.54899	0	0
BRD-K55930204__dilantin__trt_cp	45	2	-0.0416971	0.0620972	-1.5374	0	0
BRD-K24023109__Diltiazem hydrochloride__trt_cp	39	2	-0.042476	0.0629609	-1.53038	0	0
BRD-K46156294__Tyloxapol__trt_cp	11	2	-0.0835412	0.0632212	-1.52828	0	0
BRD-A08200164__melphalan__trt_cp	27	2	-0.0574644	0.0634121	-1.52675	0	0
BRD-K72903603__Zidovudine, AZT__trt_cp	9	2	-0.0884718	0.064274	-1.51985	0	0
BRD-M41783010__Acamprosate calcium__trt_cp	12	2	-0.0655909	0.0653886	-1.51104	0	0
BRD-K37270826__mifepristone__trt_cp	125	2	-0.026554	0.0653903	-1.51103	0	0
BRD-K49328571__HY-10181__trt_cp	63	2	-0.0610584	0.0656457	-1.50903	0	0
BRD-K13032584__Procarbazine hydrochloride__trt_cp	38	2	-0.0424237	0.0661498	-1.5051	0	0
BRD-A09533288__Verapamil.HCl__trt_cp	23	2	-0.0744018	0.0673337	-1.49595	0	0
BRD-K76304753__phenazopyridine__trt_cp	36	2	-0.0444164	0.0684946	-1.4871	0	0
BRD-A67605442__tetrahydrobiopterin__trt_cp	45	2	-0.0419299	0.0700622	-1.47533	0	0
BRD-K67966701__Lisinopril__trt_cp	10	2	-0.0720639	0.0704194	-1.47267	0	0
BRD-K55127134__Fluphenazine dihydrochloride__trt_cp	10	2	-0.0847448	0.0721822	-1.45973	0	0
BRD-A21490874__fluoxymesterone__trt_cp	26	2	-0.0436692	0.0723943	-1.45819	0	0
BRD-A09722536__cyclophosphamide__trt_cp	56	2	-0.031849	0.0725211	-1.45727	0	0
BRD-K65146499__NABUMETONE__trt_cp	64	2	-0.043073	0.0745373	-1.44281	0	0
BRD-K78431006__crizotinib__trt_cp	122	2	-0.0517255	0.0745977	-1.44238	0	0
BRD-K20920669__cromolyn__trt_cp	44	2	-0.0382508	0.0751167	-1.43871	0	0
BRD-K57391913__ILOPROST__trt_cp	100	2	-0.0475515	0.0755302	-1.4358	0	0
BRD-K46018455__bezafibrate__trt_cp	93	2	-0.0247575	0.0758285	-1.4337	0	0
BRD-K20920669__Cromolyn disodium salt__trt_cp	11	2	-0.0711233	0.076844	-1.42662	0	0
BRD-K79116891__Proparacaine hydrochloride__trt_cp	44	2	-0.0338056	0.077656	-1.42102	0	0
BRD-K79759585__sildenafil__trt_cp	41	2	-0.0459744	0.0780516	-1.4183	0	0
BRD-K85925969__Zalcitabine__trt_cp	11	2	-0.0750289	0.0784244	-1.41575	0	0
BRD-K48470486__Cefmetazole sodium salt__trt_cp	12	2	-0.0659219	0.0788514	-1.41284	0	0
BRD-K68264559__brimonidine__trt_cp	81	2	-0.024579	0.0790238	-1.41167	0	0
BRD-K63828191__raloxifene__trt_cp	747	2	-0.0286224	0.0800068	-1.40503	0	0
BRD-K86434416__Selegiline hydrochloride__trt_cp	12	2	-0.0595526	0.0802334	-1.4035	0	0
BRD-K50398167__Meclofenamic acid sodium salt monohydrate__trt_cp	10	2	-0.068236	0.0827878	-1.38656	0	0
BRD-K40530731__hyoscyamine__trt_cp	37	2	-0.0398728	0.0829068	-1.38578	0	0
BRD-A98725278__methysergide__trt_cp	38	2	-0.035216	0.0839382	-1.37906	0	0
BRD-K70401845__Erlotinib;OSI-774__trt_cp	136	2	-0.0387645	0.0853711	-1.36982	0	0
BRD-K28936863__KETOTIFEN FUMARATE__trt_cp	55	2	-0.0347897	0.0868418	-1.36046	0	0
BRD-K47679368__bromfenac__trt_cp	44	2	-0.0349925	0.0893601	-1.34471	0	0
BRD-K69116396__Sertindole__trt_cp	12	2	-0.0876753	0.0893712	-1.34464	0	0
BRD-K92073408__19-norethindrone__trt_cp	88	2	-0.0355267	0.0899086	-1.34132	0	0
BRD-K21450440__BENZTHIAZIDE__trt_cp	92	2	-0.025528	0.0899369	-1.34114	0	0
BRD-A56359832__zileuton__trt_cp	214	2	-0.0194402	0.0904183	-1.33818	0	0
BRD-A53576514__orphenadrine__trt_cp	37	2	-0.0428476	0.0921686	-1.32752	0	0
BRD-K49481516__galanthamine__trt_cp	37	2	-0.0380227	0.0923793	-1.32625	0	0
BRD-A17655518__IBUPROFEN__trt_cp	94	2	-0.021759	0.092718	-1.3242	0	0
BRD-A17462676__Bambuterol hydrochloride__trt_cp	9	2	-0.0772586	0.0928553	-1.32338	0	0
BRD-K67100011__Pivmecillinam hydrochloride__trt_cp	47	2	-0.0340445	0.0936938	-1.31835	0	0
BRD-A75850590__Lomefloxacin hydrochloride__trt_cp	10	2	-0.0689303	0.0945467	-1.31327	0	0
BRD-K19706299__MRE-269__trt_cp	99	2	-0.0679725	0.0958983	-1.30528	0	0
BRD-K39915878__LOXAPINE SUCCINATE__trt_cp	56	2	-0.0508654	0.0971356	-1.29805	0	0
BRD-K66296774__FLUVASTATIN__trt_cp	107	2	-0.0391216	0.0982376	-1.29166	0	0
BRD-A20119038__Mecamylamine hydrochloride__trt_cp	11	2	-0.069053	0.0985581	-1.28981	0	0
BRD-K02265150__AMOXAPINE__trt_cp	173	2	-0.0247161	0.100097	-1.281	0	0
BRD-A35258977__D-mannitol__trt_cp	25	2	-0.0430096	0.100302	-1.27983	0	0
BRD-K92760278__riboflavin__trt_cp	37	2	-0.0465544	0.101705	-1.2719	0	0
BRD-A24228527__ofloxacin__trt_cp	54	2	-0.0458596	0.101966	-1.27043	0	0
BRD-K54556307__Ethambutol dihydrochloride__trt_cp	10	2	-0.0673955	0.102341	-1.26832	0	0
BRD-A00993607__Alprenolol hydrochloride__trt_cp	10	2	-0.073227	0.102588	-1.26694	0	0
BRD-K67511046__Naloxone hydrochloride__trt_cp	63	2	-0.0243076	0.103021	-1.26452	0	0
BRD-A09722536__cyclophosphamide monohydrate__trt_cp	27	2	-0.0463814	0.104404	-1.25685	0	0
BRD-A49160188__donepezil__trt_cp	73	2	-0.0266981	0.105741	-1.2495	0	0
BRD-M30251550__Penbutolol sulfate__trt_cp	11	2	-0.0647618	0.106748	-1.24401	0	0
BRD-K70358946__aripiprazole__trt_cp	47	2	-0.0381135	0.107049	-1.24238	0	0
BRD-A19633847__perhexiline__trt_cp	108	2	-0.0349653	0.107164	-1.24175	0	0
BRD-A23770159__Rapamycin__trt_cp	172	2	-0.0395566	0.107363	-1.24067	0	0
BRD-A91699651__chloroquine__trt_cp	176	2	-0.0264575	0.10797	-1.2374	0	0
BRD-K49668410__clarithromycin__trt_cp	48	2	-0.032897	0.108094	-1.23673	0	0
BRD-K66876909__linezolid__trt_cp	48	2	-0.0401004	0.108156	-1.2364	0	0
BRD-K93754473__tamoxifen__trt_cp	843	2	-0.02102	0.108173	-1.2363	0	0
BRD-A39390670__rabeprazole__trt_cp	35	2	-0.0318824	0.109685	-1.22821	0	0
BRD-A91555231__(+_-)-norepinephrine__trt_cp	45	2	-0.0453591	0.111123	-1.22058	0	0
BRD-A70182876__Azapropazone__trt_cp	11	2	-0.0683681	0.111716	-1.21745	0	0
BRD-A07780951__orciprenaline__trt_cp	45	2	-0.0316273	0.112973	-1.21087	0	0
BRD-A29426959__carbinoxamine__trt_cp	79	2	-0.0225916	0.113248	-1.20944	0	0
BRD-A24514565__WARFARIN__trt_cp	108	2	-0.0221706	0.114099	-1.20502	0	0
BRD-K05395900__nicotine__trt_cp	45	2	-0.0400705	0.115019	-1.20026	0	0
BRD-K56558538__ambroxol__trt_cp	34	2	-0.0451811	0.115173	-1.19947	0	0
BRD-K73109821__diazoxide__trt_cp	111	2	-0.0186298	0.120106	-1.17446	0	0
BRD-K21520694__sulfacetamide__trt_cp	90	2	-0.0239747	0.120234	-1.17382	0	0
BRD-K99063460__2',3'-dideoxyinosine__trt_cp	37	2	-0.034335	0.122637	-1.16191	0	0
BRD-A09472452__flecainide__trt_cp	82	2	-0.0307287	0.12384	-1.156	0	0
BRD-K70976396__Cefoxitin sodium salt__trt_cp	11	2	-0.0570028	0.124656	-1.15202	0	0
BRD-A84174393__MELOXICAM SODIUM__trt_cp	46	2	-0.0437691	0.124765	-1.15149	0	0
BRD-K52989797__Clomipramine hydrochloride__trt_cp	38	2	-0.0333086	0.126131	-1.14487	0	0
BRD-K11433652__aspirin__trt_cp	44	2	-0.0273891	0.126559	-1.14281	0	0
BRD-K68132782__terbinafine hcl__trt_cp	37	2	-0.038719	0.12795	-1.13614	0	0
BRD-K51350053__TOREMIPHENE CITRATE__trt_cp	47	2	-0.0316655	0.128705	-1.13253	0	0
BRD-K10961822__latanoprost__trt_cp	37	2	-0.0383204	0.128804	-1.13206	0	0
BRD-K86161929__cortisone__trt_cp	45	2	-0.0267635	0.129722	-1.12771	0	0
BRD-K57179821__483-63-6__trt_cp	37	2	-0.0367429	0.130179	-1.12554	0	0
BRD-K60640630__Mometasone furoate__trt_cp	29	2	-0.0382486	0.132894	-1.11282	0	0
BRD-K37130656__S3002__trt_cp	64	2	-0.0258144	0.133707	-1.10904	0	0
BRD-K89152108__Liothyronine__trt_cp	11	2	-0.0571284	0.134305	-1.10627	0	0
BRD-K88043978__Amikacin hydrate__trt_cp	10	2	-0.0613596	0.135674	-1.09996	0	0
BRD-K05658747__S2005__trt_cp	61	2	-0.0268501	0.136832	-1.09466	0	0
BRD-K98769987__flumazenil__trt_cp	104	2	-0.0244578	0.138281	-1.08808	0	0
BRD-K97045029__Pranlukast__trt_cp	12	2	-0.0543876	0.139407	-1.08299	0	0
BRD-K63641886__cefuroxime__trt_cp	45	2	-0.0313145	0.139805	-1.08119	0	0
BRD-K14705039__Sulfathiazole__trt_cp	10	2	-0.0521339	0.142412	-1.06955	0	0
BRD-A84481105__thioridazine__trt_poscon	151	2	-0.0462318	0.145021	-1.05803	0	0
BRD-K49111258__PRAZOSIN HYDROCHLORIDE__trt_cp	37	2	-0.0271917	0.147603	-1.04677	0	0
BRD-A79803969__memantine__trt_cp	42	2	-0.0289671	0.149369	-1.03914	0	0
BRD-K60369935__Ribavirin__trt_cp	11	2	-0.0561389	0.149567	-1.03829	0	0
BRD-K93034159__cladribine__trt_cp	56	2	-0.0424385	0.151448	-1.03024	0	0
BRD-K63242551__Cefadroxil__trt_cp	12	2	-0.045408	0.151503	-1.03001	0	0
BRD-A59303141__Quinethazone__trt_cp	64	2	-0.0201867	0.153151	-1.02301	0	0
BRD-K23369905__oxiconazole__trt_cp	36	2	-0.0333056	0.153761	-1.02043	0	0
BRD-K38197229__bumetanide__trt_cp	160	2	-0.0191469	0.154021	-1.01934	0	0
BRD-K84175871__pseudoephedrine__trt_cp	38	2	-0.0256035	0.155536	-1.01298	0	0
BRD-K60762818__desipramine__trt_cp	39	2	-0.0376295	0.156516	-1.00888	0	0
BRD-M98649031__Dimenhydrinate__trt_cp	10	2	-0.0518613	0.156606	-1.0085	0	0
BRD-K62363391__dapsone__trt_cp	53	2	-0.0281057	0.156949	-1.00707	0	0
BRD-K82143716__5-fluorocytosine__trt_cp	37	2	-0.0331566	0.15768	-1.00404	0	0
BRD-A31836915__Cyanocobalamin__trt_cp	12	2	-0.0500597	0.157988	-1.00276	0	0
BRD-K18922609__Neostigmine bromide__trt_cp	12	2	-0.0488537	0.160074	-0.994153	0	0
BRD-A56892734__esomeprazole mg__trt_cp	36	2	-0.0316455	0.160205	-0.993617	0	0
BRD-K97181089__Amiloride hydrochloride dihydrate__trt_cp	10	2	-0.0639693	0.160662	-0.991743	0	0
BRD-A73635141__hydrocortisone__trt_cp	27	2	-0.0323785	0.160736	-0.991439	0	0
BRD-A23712469__Bacitracin__trt_cp	11	2	-0.0455718	0.161593	-0.987934	0	0
BRD-K60770992__PERGOLIDE MESYLATE__trt_cp	57	2	-0.0228726	0.161689	-0.987539	0	0
BRD-A37444045__Hydralazine hydrochloride__trt_cp	10	2	-0.0571705	0.163611	-0.979724	0	0
BRD-K56343971__PLX-4032__trt_cp	168	2	-0.0403127	0.163652	-0.979561	0	0
BRD-A57133233__Chlorcyclizine hydrochloride__trt_cp	12	2	-0.0481219	0.163716	-0.979298	0	0
BRD-A73368467__Fexofenadine HCl__trt_cp	11	2	-0.0539696	0.163986	-0.978207	0	0
BRD-K43887077__Dopamine hydrochloride__trt_cp	11	2	-0.0487088	0.166168	-0.96942	0	0
BRD-K16606819__Trimethadione__trt_cp	12	2	-0.0488104	0.167215	-0.965229	0	0
BRD-K88682005__Chlorothiazide__trt_cp	10	2	-0.0481183	0.167658	-0.963462	0	0
BRD-K79602928__Metformin hydrochloride__trt_cp	10	2	-0.0502418	0.167951	-0.962295	0	0
BRD-K70301876__ESCITALOPRAM OXALATE__trt_cp	47	2	-0.0285061	0.170344	-0.952806	0	0
BRD-K03406345__EWS-FLI-Inhibitor__trt_cp	15	2	-0.0481151	0.170652	-0.951592	0	0
BRD-K98174813__Chlorzoxazone__trt_cp	10	2	-0.0473956	0.170669	-0.951524	0	0
BRD-A88774919__doxycycline__trt_cp	45	2	-0.0278252	0.172326	-0.945014	0	0
BRD-K87024524__Phenelzine sulfate__trt_cp	10	2	-0.0555552	0.172806	-0.943134	0	0
BRD-K32273377__Sulfadiazine__trt_cp	10	2	-0.0441712	0.175862	-0.931251	0	0
BRD-K92760278__Riboflavine__trt_cp	47	2	-0.0218443	0.177209	-0.926055	0	0
BRD-K24023109__diltiazem__trt_cp	37	2	-0.0266472	0.177217	-0.926022	0	0
BRD-K59456551__l-glutamic acid, n-[4-[[(2,4-diamino-6-pteridinyl)methyl]methylamino]benzoyl]- [cas]__trt_cp	36	2	-0.0367733	0.177478	-0.92502	0	0
BRD-K02275692__Cefotiam hydrochloride__trt_cp	33	2	-0.0290976	0.179582	-0.916961	0	0
BRD-K08681769__Ibandronate sodium__trt_cp	12	2	-0.0471736	0.180163	-0.914743	0	0
BRD-K92723993__Imatinib_Gleevec, Glivec, CGP-57148B, STI-571__trt_cp	179	2	-0.0206148	0.181088	-0.911225	0	0
BRD-M73371355__R(-) Apomorphine hydrochloride hemihydrate__trt_cp	10	2	-0.0456101	0.181456	-0.90983	0	0
BRD-A45889380__quinacrine__trt_cp	108	2	-0.0340928	0.181478	-0.909749	0	0
BRD-K11742128__TRIPROLIDINE HYDROCHLORIDE__trt_cp	53	2	-0.0214442	0.182269	-0.906753	0	0
BRD-K68132782__terbinafine__trt_cp	45	2	-0.0214889	0.183083	-0.903677	0	0
BRD-K07237224__Moclobemide__trt_cp	10	2	-0.0490456	0.18409	-0.899889	0	0
BRD-K95237249__probenecid__trt_cp	163	2	-0.0162653	0.185283	-0.895412	0	0
BRD-A94543220__bifonazole__trt_cp	37	2	-0.0275548	0.187149	-0.88845	0	0
BRD-K28936863__SA792148__trt_cp	38	2	-0.0440423	0.187674	-0.886499	0	0
BRD-K91263825__nortriptyline__trt_cp	64	2	-0.0318341	0.188607	-0.88304	0	0
BRD-A89175223__BISOPROLOL FUMARATE__trt_cp	46	2	-0.023699	0.189767	-0.878756	0	0
BRD-A02759312__betaxolol__trt_cp	37	2	-0.032495	0.189861	-0.878408	0	0
BRD-A16478930__amcinonide__trt_cp	42	2	-0.0230554	0.189998	-0.877902	0	0
BRD-K47832606__S1299__trt_cp	64	2	-0.0280622	0.19001	-0.877859	0	0
BRD-K97181089__pyrazinecarboxamide, 3,5-diamino-n-(aminoiminomethyl)-6-chloro- [cas]__trt_cp	37	2	-0.0389952	0.191128	-0.873748	0	0
BRD-K72222507__quinapril__trt_cp	23	2	-0.0316443	0.191306	-0.873093	0	0
BRD-A50311610__duremesin__trt_cp	45	2	-0.0201966	0.191854	-0.871085	0	0
BRD-K91289464__Cefotetan__trt_cp	12	2	-0.0429621	0.192017	-0.870487	0	0
BRD-K71013094__Neomycin sulfate__trt_cp	10	2	-0.0459876	0.19287	-0.867367	0	0
BRD-K60160658__tiagabine hcl__trt_cp	37	2	-0.0257458	0.195283	-0.858591	0	0
BRD-K96253961__Metaraminol bitartrate__trt_cp	10	2	-0.0411802	0.195715	-0.857029	0	0
BRD-K89348303__ramipril__trt_cp	82	2	-0.0185011	0.19747	-0.850692	0	0
BRD-K92428153__mycophenolate-mofetil__trt_cp	36	2	-0.0337239	0.199003	-0.845188	0	0
BRD-K18910433__beta-estradiol__trt_cp	37	2	-0.02645	0.199344	-0.843967	0	0
BRD-K76723084__13-cis Retinoic acid __trt_cp	22	2	-0.0387913	0.199733	-0.842576	0	0
BRD-K59632282__QUINIDINE GLUCONATE__trt_cp	27	2	-0.0270404	0.200615	-0.839426	0	0
BRD-A09472452__Flecainide acetate__trt_cp	57	2	-0.0200943	0.201013	-0.83801	0	0
BRD-K13078532__Hydrochlorothiazide__trt_cp	10	2	-0.049401	0.201782	-0.835271	0	0
BRD-K62736196__Guanabenz acetate__trt_cp	46	2	-0.0214324	0.203057	-0.830753	0	0
BRD-K06980535__promazine__trt_cp	36	2	-0.0317959	0.20357	-0.828937	0	0
BRD-K13238168__Haloprogin__trt_cp	12	2	-0.0518246	0.204641	-0.825156	0	0
BRD-K73437736__Azlocillin sodium salt__trt_cp	11	2	-0.047093	0.205805	-0.821065	0	0
BRD-A29734509__DISOPYRAMIDE PHOSPHATE__trt_cp	47	2	-0.0236688	0.207872	-0.813829	0	0
BRD-A99833829__urecholine__trt_cp	45	2	-0.0235309	0.209693	-0.807488	0	0
BRD-K73589491__nizatidine__trt_cp	99	2	-0.014538	0.210271	-0.805482	0	0
BRD-K20141153__Tomoxetine hydrochloride__trt_cp	41	2	-0.0213403	0.210343	-0.805233	0	0
BRD-K92073408__Norethindrone__trt_cp	33	2	-0.0290807	0.210844	-0.803496	0	0
BRD-K57773246__Colistin sulfate__trt_cp	12	2	-0.0381687	0.210918	-0.803239	0	0
BRD-K54316499__tolterodine__trt_cp	35	2	-0.0284253	0.21115	-0.802438	0	0
BRD-K21283037__Riluzole hydrochloride__trt_cp	38	2	-0.0253887	0.212451	-0.797945	0	0
BRD-A20348246__Chlormezanone__trt_cp	10	2	-0.043452	0.212732	-0.796978	0	0
BRD-K24053527__DEXTROMETHORPHAN HYDROBROMIDE__trt_cp	46	2	-0.0206748	0.214797	-0.789887	0	0
BRD-K86887724__dofetilide__trt_cp	37	2	-0.0245234	0.216573	-0.783819	0	0
BRD-K41260949__valproic-acid__trt_cp	111	2	-0.0225043	0.21667	-0.783488	0	0
BRD-K30020243__aliskiren__trt_cp	36	2	-0.0247727	0.216721	-0.783314	0	0
BRD-K33106058__cytarabine__trt_cp	48	2	-0.0307672	0.218315	-0.777895	0	0
BRD-K75641298__METOCLOPRAMIDE HYDROCHLORIDE__trt_cp	29	2	-0.0234945	0.218542	-0.777127	0	0
BRD-K28029915__Dolasetron mesilate__trt_cp	11	2	-0.0415567	0.219512	-0.773844	0	0
BRD-A09056319__alfuzosin__trt_cp	71	2	-0.0170655	0.220293	-0.771203	0	0
BRD-U88459701__atorvastatin__trt_cp	207	2	-0.0191671	0.220733	-0.76972	0	0
BRD-K53737926__amitriptyline__trt_cp	36	2	-0.0250707	0.221925	-0.765708	0	0
BRD-A79672927__TROPICAMIDE__trt_cp	152	2	-0.00985865	0.222931	-0.762331	0	0
BRD-K93645900__TADALAFIL__trt_cp	114	2	-0.0129392	0.223463	-0.760548	0	0
BRD-A84174393__meloxicam__trt_cp	82	2	-0.0169809	0.224705	-0.756399	0	0
BRD-A23072235__pheniramine__trt_cp	37	2	-0.0182927	0.224903	-0.755738	0	0
BRD-K30480208__torasemide__trt_cp	35	2	-0.0223582	0.226858	-0.749235	0	0
BRD-A97437073__Rosiglitazone Hydrochloride__trt_cp	11	2	-0.0409828	0.227156	-0.748247	0	0
BRD-A90131694__ALCLOMETAZONE DIPROPIONATE__trt_cp	46	2	-0.0218749	0.228326	-0.744371	0	0
BRD-A33084557__Tioconazole__trt_cp	10	2	-0.0397847	0.229429	-0.740729	0	0
BRD-K10670311__sulfasalazine__trt_cp	49	2	-0.0163741	0.229685	-0.739884	0	0
BRD-K63630713__ETHACRYNIC ACID__trt_cp	106	2	-0.0185716	0.230694	-0.736564	0	0
BRD-K66615216__moxifloxacin hcl__trt_cp	37	2	-0.0232703	0.231802	-0.732925	0	0
BRD-K70511574__Sutent;SU11248;Sunitinibmalate__trt_cp	135	2	-0.0186638	0.232767	-0.729766	0	0
BRD-K52930707__Rescinnamin__trt_cp	29	2	-0.0274363	0.233161	-0.728475	0	0
BRD-K37814297__acepromazine__trt_cp	37	2	-0.0249888	0.233949	-0.725905	0	0
BRD-K72166146__DIHYDROERGOTAMINE MESYLATE__trt_cp	46	2	-0.0174038	0.236497	-0.717617	0	0
BRD-A42571354__Cetirizine dihydrochloride__trt_cp	12	2	-0.0381238	0.23703	-0.715888	0	0
BRD-K08356259__Xylometazoline hydrochloride__trt_cp	10	2	-0.0395943	0.237256	-0.715159	0	0
BRD-K57545991__enalapril__trt_cp	36	2	-0.0216375	0.241368	-0.701909	0	0
BRD-K60770992__pergolide__trt_cp	73	2	-0.0153526	0.241738	-0.700722	0	0
BRD-K55034111__pefloxacin__trt_cp	36	2	-0.0233738	0.241864	-0.700319	0	0
BRD-K79759585__SILDENAFIL CITRATE__trt_cp	46	2	-0.0217345	0.242903	-0.696996	0	0
BRD-K52256627__Chlorhexidine__trt_cp	10	2	-0.0453036	0.243727	-0.694363	0	0
BRD-K68264559__UK 14,304 tartrate__trt_cp	29	2	-0.0207278	0.244402	-0.692212	0	0
BRD-A97104540__FENOTEROL HYDROBROMIDE__trt_cp	57	2	-0.0211447	0.244523	-0.691829	0	0
BRD-K71879491__ATRA__trt_cp	205	2	-0.0221445	0.244736	-0.69115	0	0
BRD-K29458283__CHLORAMBUCIL__trt_cp	166	2	-0.0142069	0.247045	-0.683819	0	0
BRD-K18910433__Estradiol-17 beta__trt_cp	12	2	-0.0292429	0.249715	-0.675387	0	0
BRD-K33453211__Levocabastine hydrochloride__trt_cp	38	2	-0.0156986	0.253005	-0.665064	0	0
BRD-K61250553__imodium__trt_cp	45	2	-0.0215508	0.25319	-0.664486	0	0
BRD-K71103788__duloxetine__trt_cp	73	2	-0.0162176	0.254773	-0.659544	0	0
BRD-K52756523__Dirithromycin__trt_cp	12	2	-0.0343	0.255177	-0.658287	0	0
BRD-K00259736__Colchicine__trt_cp	10	2	-0.0380307	0.255885	-0.656083	0	0
BRD-K55191674__PENICILLIN G POTASSIUM__trt_cp	43	2	-0.028546	0.256719	-0.653495	0	0
BRD-A16444946__acarbose__trt_cp	73	2	-0.0124156	0.257446	-0.65124	0	0
BRD-K19352500__PROCHLORPERAZINE EDISYLATE__trt_cp	45	2	-0.0199897	0.257646	-0.650618	0	0
BRD-A26711594__NICARDIPINE HYDROCHLORIDE__trt_cp	234	2	-0.0127886	0.259134	-0.646017	0	0
BRD-K35483542__GR-101__trt_cp	67	2	-0.020679	0.260259	-0.642546	0	0
BRD-A33168282__sotalol__trt_cp	37	2	-0.0173962	0.260676	-0.641263	0	0
BRD-K15567136__PAPAVERINE HYDROCHLORIDE__trt_cp	41	2	-0.0240549	0.261388	-0.639072	0	0
BRD-K50859149__sulfafurazole__trt_cp	34	2	-0.0196591	0.262977	-0.634194	0	0
BRD-K34888156__Theobromine__trt_cp	11	2	-0.0317382	0.263732	-0.631882	0	0
BRD-K88809146__Tranylcypromine__trt_cp	23	2	-0.0221972	0.263807	-0.631653	0	0
BRD-A04352665__M193000.cdx__trt_cp	173	2	-0.0127806	0.263905	-0.631351	0	0
BRD-A09533288__verapamil__trt_cp	74	2	-0.0133547	0.265493	-0.6265	0	0
BRD-K93754473__Tamoxifen citrate__trt_cp	50	2	-0.0181024	0.26583	-0.625474	0	0
BRD-K55055802__1h-imidazole-5-carboxylic acid, 1-(1-phenylethyl)-, ethyl ester, (r)- [cas]__trt_cp	37	2	-0.0193493	0.265943	-0.625128	0	0
BRD-M34926192__Guanadrel sulfate__trt_cp	12	2	-0.0266905	0.267836	-0.61937	0	0
BRD-A84174873__Baclofen (R,S)__trt_cp	10	2	-0.0331065	0.268038	-0.618757	0	0
BRD-K60511616__SA792815__trt_cp	24	2	-0.0315206	0.270439	-0.611485	0	0
BRD-A07395371__Esmolol hydrochloride__trt_cp	11	2	-0.029101	0.27089	-0.610122	0	0
BRD-K86434416__deprenalin__trt_cp	88	2	-0.0125287	0.271044	-0.609658	0	0
BRD-A14395271__Mesoridazine besylate__trt_cp	12	2	-0.036156	0.272363	-0.605682	0	0
BRD-K50398167__MECLOFENAMATE SODIUM__trt_cp	26	2	-0.0203491	0.273244	-0.603033	0	0
BRD-K41731458__TRICLOSAN__trt_cp	92	2	-0.0159107	0.274841	-0.598235	0	0
BRD-K62737565__Gabapentin__trt_cp	11	2	-0.0285357	0.276662	-0.592786	0	0
BRD-K82941592__rosuvastatin__trt_cp	36	2	-0.0187926	0.277038	-0.591665	0	0
BRD-K76723084__GR-102__trt_cp	67	2	-0.0179551	0.277354	-0.590719	0	0
BRD-K89046952__Cyclacillin__trt_cp	29	2	-0.0203865	0.277493	-0.590305	0	0
BRD-K74501079__azithromycin__trt_cp	57	2	-0.0167058	0.277625	-0.589913	0	0
BRD-K38305202__DOMPERIDONE__trt_cp	83	2	-0.0129531	0.27839	-0.58763	0	0
BRD-A65280694__Molindone hydrochloride__trt_cp	64	2	-0.0151252	0.279099	-0.58552	0	0
BRD-K08327065__Kanamycin A sulfate__trt_cp	10	2	-0.0345698	0.279207	-0.5852	0	0
BRD-A13133631__FLUOROMETHOLONE__trt_cp	52	2	-0.0193449	0.279918	-0.583086	0	0
BRD-A27489425__rolitetracycline__trt_cp	49	2	-0.0212604	0.280832	-0.58037	0	0
BRD-K72259270__Dyclonine hydrochloride__trt_cp	10	2	-0.027655	0.281338	-0.57887	0	0
BRD-A79803969__Memantine Hydrochloride__trt_cp	11	2	-0.0364395	0.282195	-0.576334	0	0
BRD-K58626373__Dexfenfluramine hydrochloride__trt_cp	12	2	-0.0336442	0.282429	-0.57564	0	0
BRD-K91290917__Amodiaquin dihydrochloride dihydrate__trt_cp	57	2	-0.0136814	0.283563	-0.57229	0	0
BRD-K05673000__Dicloxacillin sodium salt hydrate__trt_cp	12	2	-0.0316875	0.285293	-0.567189	0	0
BRD-A42571354__CETIRIZINE HYDROCHLORIDE__trt_cp	27	2	-0.016572	0.287613	-0.56037	0	0
BRD-K69260336__Pivampicillin__trt_cp	11	2	-0.0256554	0.287657	-0.560242	0	0
BRD-A68723818__SA58861__trt_cp	24	2	-0.0200126	0.288412	-0.55803	0	0
BRD-A31800922__kemadrin__trt_cp	45	2	-0.0153288	0.288619	-0.557423	0	0
BRD-A45889380__Quinacrine dihydrochloride dihydrate__trt_cp	10	2	-0.0458367	0.290186	-0.55284	0	0
BRD-A89175223__bisoprolol__trt_cp	73	2	-0.0112074	0.292483	-0.546145	0	0
BRD-K04218075__clomifene__trt_cp	179	2	-0.0143796	0.292782	-0.545274	0	0
BRD-A29734509__norpace__trt_cp	44	2	-0.0135479	0.296469	-0.534584	0	0
BRD-K81128206__edrophonium__trt_cp	45	2	-0.0121002	0.297429	-0.531809	0	0
BRD-K61192372__S1156__trt_cp	63	2	-0.0128161	0.298155	-0.529715	0	0
BRD-A64977602__Mirtazepine__trt_cp	46	2	-0.0124661	0.298292	-0.529319	0	0
BRD-K61327230__Pralidoxime chloride__trt_cp	11	2	-0.0240295	0.299336	-0.526311	0	0
BRD-K29582677__FLUNARIZINE HYDROCHLORIDE__trt_cp	45	2	-0.0137749	0.300449	-0.523109	0	0
BRD-A68723818__brompheniramine__trt_cp	36	2	-0.0173961	0.301093	-0.52126	0	0
BRD-K82143716__Flucytosine__trt_cp	11	2	-0.0253249	0.30119	-0.520982	0	0
BRD-A99833829__Bethanechol chloride__trt_cp	11	2	-0.0284738	0.301208	-0.52093	0	0
BRD-K03243820__Trifluridine__trt_cp	35	2	-0.0171643	0.301429	-0.520295	0	0
BRD-K63828191__RALOXIFENE HYDROCHLORIDE__trt_cp	58	2	-0.0138433	0.302763	-0.516471	0	0
BRD-K29653726__topiramate__trt_cp	48	2	-0.0150758	0.303339	-0.51482	0	0
BRD-A73368467__fexofenadine__trt_cp	36	2	-0.014052	0.303468	-0.514452	0	0
BRD-A67097164__Ifosfamide__trt_cp	11	2	-0.0274862	0.304153	-0.512493	0	0
BRD-A75919782__Folinic acid calcium salt__trt_cp	11	2	-0.0293578	0.305065	-0.509888	0	0
BRD-K98530306__clonidine__trt_cp	36	2	-0.0164008	0.307079	-0.504146	0	0
BRD-K90789829__Nefazodone hydrochloride__trt_cp	29	2	-0.022056	0.307692	-0.502404	0	0
BRD-A23801136__Rifabutin__trt_cp	11	2	-0.0258146	0.307938	-0.501705	0	0
BRD-K72816382__cinalukast__trt_cp	64	2	-0.0129219	0.308111	-0.501213	0	0
BRD-K71799949__CARBAMAZEPINE__trt_cp	331	2	-0.0090018	0.309472	-0.497347	0	0
BRD-A84481105__thioridazine__trt_cp	521	2	-0.0108341	0.309522	-0.497207	0	0
BRD-K55250441__Sulfadoxine__trt_cp	11	2	-0.0239402	0.311915	-0.490429	0	0
BRD-A17883755__Lenalidomide__trt_cp	171	2	-0.0076562	0.312962	-0.487473	0	0
BRD-K22936972__Diphenylpyraline hydrochloride__trt_cp	12	2	-0.0232352	0.313543	-0.485832	0	0
BRD-K04046242__equilin__trt_cp	351	2	-0.0148136	0.315747	-0.479624	0	0
BRD-A33711280__Metixene hydrochloride__trt_cp	64	2	-0.0119828	0.317158	-0.47566	0	0
BRD-K76810206__NICERGOLINE__trt_cp	83	2	-0.0110381	0.317302	-0.475257	0	0
BRD-K72542090__Clodronate__trt_cp	12	2	-0.0222969	0.319361	-0.469485	0	0
BRD-K06902185__minoxidil__trt_cp	88	2	-0.00810906	0.320682	-0.465793	0	0
BRD-K18910433__beta-estradiol__trt_poscon	8	2	-0.0312347	0.320745	-0.465616	0	0
BRD-K35483542__R4643__trt_cp	66	2	-0.0157885	0.320767	-0.465554	0	0
BRD-K48617017__Dorzolamide hydrochloride__trt_cp	11	2	-0.0230055	0.321111	-0.464595	0	0
BRD-K63675182__TRIFLUPROMAZINE HYDROCHLORIDE__trt_cp	57	2	-0.01471	0.323263	-0.458593	0	0
BRD-A09056319__Alfuzosin hydrochloride__trt_cp	10	2	-0.0260586	0.3306	-0.438257	0	0
BRD-K44942604__Pentolinium bitartrate__trt_cp	10	2	-0.0211396	0.331215	-0.43656	0	0
BRD-A53576514__ORPHENADRINE CITRATE__trt_cp	28	2	-0.0159684	0.331377	-0.436113	0	0
BRD-A95869247__INDAPAMIDE__trt_cp	151	2	-0.00621411	0.331592	-0.435521	0	0
BRD-K86307448__Allopurinol__trt_cp	11	2	-0.0213772	0.332377	-0.43336	0	0
BRD-A75368507__demeclocycline__trt_cp	44	2	-0.0107757	0.336637	-0.421658	0	0
BRD-K82941592__ROSUVASTATIN CALCIUM__trt_cp	47	2	-0.0137685	0.336829	-0.421133	0	0
BRD-K31534764__fluvoxamine__trt_cp	37	2	-0.0139985	0.33793	-0.41812	0	0
BRD-A19195498__Trimipramine maleate salt__trt_cp	11	2	-0.0205563	0.339239	-0.414541	0	0
BRD-A89585551__Mefloquine hydrochloride__trt_cp	10	2	-0.0230077	0.341242	-0.409076	0	0
BRD-K63828191__evista__trt_cp	45	2	-0.012274	0.343756	-0.402233	0	0
BRD-K67100011__pivmecillinam__trt_cp	37	2	-0.0136938	0.344121	-0.401242	0	0
BRD-A67799922__dibenzyline__trt_cp	88	2	-0.0088302	0.345526	-0.397428	0	0
BRD-K05395900__NICOTINE DITARTRATE__trt_cp	52	2	-0.00852048	0.347635	-0.391713	0	0
BRD-K03406345__azacitidine__trt_cp	12	2	-0.0223806	0.349196	-0.387492	0	0
BRD-K98530306__Clonidine.HCl__trt_cp	23	2	-0.0144955	0.352127	-0.379584	0	0
BRD-K55696337__Topotecan__trt_cp	8	2	-0.0333357	0.353567	-0.375708	0	0
BRD-K34730807__Levodopa__trt_cp	10	2	-0.021125	0.354355	-0.37359	0	0
BRD-K41406082__Sulfapyridine__trt_cp	12	2	-0.0211946	0.355997	-0.369179	0	0
BRD-A26334849__rythmol__trt_cp	90	2	-0.00974034	0.356483	-0.367877	0	0
BRD-K68432770__Ampicillin trihydrate__trt_cp	10	2	-0.0197782	0.35698	-0.366543	0	0
BRD-K25433859__maprotilline hcl__trt_cp	37	2	-0.0127604	0.357512	-0.365118	0	0
BRD-K73999723__telmisartan__trt_cp	113	2	-0.00655413	0.359591	-0.359553	0	0
BRD-K71289571__zafirlukast__trt_cp	94	2	-0.00792012	0.35969	-0.359289	0	0
BRD-K48578705__Methyldopa (L,-)__trt_cp	10	2	-0.022926	0.360459	-0.357233	0	0
BRD-A10977446__CARVEDILOL__trt_cp	129	2	-0.00766118	0.363149	-0.350054	0	0
BRD-K76634210__Idoxuridine__trt_cp	10	2	-0.0190402	0.364275	-0.347055	0	0
BRD-A60052764__Flucloxacillin sodium__trt_cp	11	2	-0.0190754	0.365684	-0.343306	0	0
BRD-M41783010__acamprosate__trt_cp	37	2	-0.0136357	0.366954	-0.339931	0	0
BRD-K11196887__Norfloxacin__trt_cp	10	2	-0.017482	0.369992	-0.331875	0	0
BRD-A84481105__Thioridazine hydrochloride__trt_cp	10	2	-0.0196499	0.371818	-0.327042	0	0
BRD-K33396764__alpha-linolenic-acid__trt_cp	67	2	-0.00835047	0.372741	-0.324601	0	0
BRD-A35782587__Verteporfin__trt_cp	11	2	-0.0238016	0.373152	-0.323516	0	0
BRD-K94436377__Diosmin__trt_cp	12	2	-0.0128925	0.377138	-0.313006	0	0
BRD-K97181089__Amiloride hydrochloride__trt_cp	28	2	-0.0113526	0.378867	-0.308458	0	0
BRD-A98725278__Methysergide maleate__trt_cp	33	2	-0.00819276	0.380566	-0.303995	0	0
BRD-A90799790__Isradipine__trt_cp	63	2	-0.00653462	0.381689	-0.301048	0	0
BRD-K92428153__MYCOPHENOLATE MOFETIL__trt_cp	27	2	-0.0133837	0.38211	-0.299943	0	0
BRD-K83636919__entacapone__trt_cp	45	2	-0.00798143	0.382547	-0.298797	0	0
BRD-K47886988__Nalidixic acid sodium salt__trt_cp	12	2	-0.0138263	0.382776	-0.298198	0	0
BRD-K89997465__Chlorpromazine hydrochloride__trt_cp	19	2	-0.0143108	0.383804	-0.295505	0	0
BRD-A88254928__salbutamol__trt_cp	47	2	-0.00855813	0.384339	-0.294106	0	0
BRD-A51964809__Halofantrine hydrochloride__trt_cp	11	2	-0.0159573	0.385448	-0.291203	0	0
BRD-A39189014__Methoxamine hydrochloride__trt_cp	12	2	-0.0126691	0.385581	-0.290856	0	0
BRD-K51471001__Demecarium bromide__trt_cp	12	2	-0.0137337	0.385964	-0.289853	0	0
BRD-K71103788__DULOXETINE HYDROCHLORIDE__trt_cp	46	2	-0.00841982	0.386141	-0.289391	0	0
BRD-K37991163__PAROXETINE HYDROCHLORIDE__trt_cp	58	2	-0.0119581	0.386523	-0.288393	0	0
BRD-K36627727__T3205__trt_cp	66	2	-0.0103212	0.388259	-0.28386	0	0
BRD-K67080878__milrinone__trt_cp	118	2	-0.00512911	0.388702	-0.282703	0	0
BRD-K61250553__loperamide__trt_cp	37	2	-0.0113945	0.389041	-0.281821	0	0
BRD-K05510762__Granisetron__trt_cp	10	2	-0.0150625	0.389325	-0.281078	0	0
BRD-K22429181__all-trans-Retinol__trt_cp	23	2	-0.0131927	0.391205	-0.276179	0	0
BRD-K81839095__estrone__trt_cp	372	2	-0.00685156	0.392468	-0.272892	0	0
BRD-K18618618__cimetidine__trt_cp	72	2	-0.00547004	0.393896	-0.269179	0	0
BRD-K11640013__Sulfamethazine sodium salt__trt_cp	12	2	-0.0126128	0.394284	-0.268171	0	0
BRD-K74514084__Pazopanibhydrochloride;GW786034__trt_cp	136	2	-0.00888088	0.394503	-0.267601	0	0
BRD-A92670106__tocainide__trt_cp	37	2	-0.0105978	0.395404	-0.265262	0	0
BRD-K53972329__S1378__trt_cp	67	2	-0.00925307	0.395451	-0.265138	0	0
BRD-K57875380__Asenapine maleate__trt_cp	10	2	-0.0140273	0.398533	-0.257146	0	0
BRD-K96786677__Oxacillin sodium__trt_cp	12	2	-0.0118338	0.400137	-0.252992	0	0
BRD-K44876623__zolpidem__trt_cp	81	2	-0.0048536	0.401568	-0.24929	0	0
BRD-A26384407__chlortalidone__trt_cp	39	2	-0.00630686	0.403473	-0.244368	0	0
BRD-K88809146__Tranylcypromine hydrochloride__trt_cp	10	2	-0.0133361	0.403531	-0.244218	0	0
BRD-K70131229__Glucosamine HCl__trt_cp	23	2	-0.00737381	0.404103	-0.242742	0	0
BRD-K91315211__Betahistine mesylate__trt_cp	12	2	-0.0113243	0.406427	-0.236745	0	0
BRD-A57382968__SA792247__trt_cp	40	2	-0.0130025	0.407516	-0.233939	0	0
BRD-K55044200__amoxicillin crystalline__trt_cp	45	2	-0.00894426	0.408478	-0.231462	0	0
BRD-A48430263__PIOGLITAZONE HYDROCHLORIDE__trt_cp	47	2	-0.00566553	0.40938	-0.229141	0	0
BRD-A91008255__BEPRIDIL HYDROCHLORIDE__trt_cp	57	2	-0.00556664	0.412438	-0.221278	0	0
BRD-K62200014__ANAGRELIDE HYDROCHLORIDE__trt_cp	47	2	-0.00813988	0.412857	-0.220202	0	0
BRD-K15567136__papaverine__trt_cp	37	2	-0.0104583	0.413861	-0.217625	0	0
BRD-K47869605__podofilox__trt_cp	72	2	-0.00761467	0.414234	-0.216666	0	0
BRD-A29260609__Acebutolol hydrochloride__trt_cp	10	2	-0.00988462	0.415142	-0.214337	0	0
BRD-A09722536__cytoxan__trt_cp	45	2	-0.00752174	0.415257	-0.214041	0	0
BRD-K50938287__sumatriptan__trt_cp	37	2	-0.00760927	0.416279	-0.211422	0	0
BRD-K76304753__PHENAZOPYRIDINE HYDROCHLORIDE__trt_cp	41	2	-0.00691421	0.418061	-0.206857	0	0
BRD-K49328571__Dasatinib_BMS-354825, Sprycel, BMS354825__trt_cp	180	2	-0.00937921	0.418541	-0.205628	0	0
BRD-K99121711__Dibucaine__trt_cp	10	2	-0.00927113	0.418784	-0.205005	0	0
BRD-A49172652__lansoprazole__trt_cp	45	2	-0.00875724	0.421097	-0.199088	0	0
BRD-K33396764__LINOLENIC ACID (18_3 n-3)__trt_cp	27	2	-0.00705949	0.421222	-0.198767	0	0
BRD-K89732114__trifluoperazine__trt_cp	454	2	-0.00386359	0.422658	-0.195099	0	0
BRD-A13188892__Doxazosin mesylate__trt_cp	11	2	-0.00928019	0.423115	-0.19393	0	0
BRD-A84465106__Nisoldipine__trt_cp	12	2	-0.01079	0.425266	-0.18844	0	0
BRD-A16332958__modafinil__trt_cp	110	2	-0.00342257	0.426764	-0.18462	0	0
BRD-K50398167__meclofenamic-acid__trt_cp	36	2	-0.00615105	0.427778	-0.182033	0	0
BRD-A41304429__Practolol__trt_cp	91	2	-0.00357783	0.429619	-0.177344	0	0
BRD-K34685430__Methylergometrine maleate__trt_cp	10	2	-0.0112154	0.432912	-0.168966	0	0
BRD-K42098891__protriptyline__trt_cp	36	2	-0.0056583	0.434413	-0.165151	0	0
BRD-K46435977__valaciclovir__trt_cp	37	2	-0.00651917	0.436288	-0.160388	0	0
BRD-A44448661__PENTOBARBITAL__trt_cp	62	2	-0.005163	0.438118	-0.155743	0	0
BRD-K50398167__meclomen__trt_cp	45	2	-0.00346224	0.439233	-0.152914	0	0
BRD-K18574842__nafcillin__trt_cp	37	2	-0.00583309	0.439433	-0.152408	0	0
BRD-K15502390__viramune__trt_cp	37	2	-0.00481409	0.440111	-0.150687	0	0
BRD-K13032584__procarbazine__trt_cp	73	2	-0.00355543	0.440378	-0.150011	0	0
BRD-A07780951__metaproterenol__trt_cp	44	2	-0.00371609	0.442546	-0.144517	0	0
BRD-A22032524__AMLODIPINE BESYLATE__trt_cp	47	2	-0.00507306	0.445706	-0.136519	0	0
BRD-K57930253__nitrazepam__trt_cp	37	2	-0.00521755	0.447319	-0.132439	0	0
BRD-K45542189__DIETHYLCARBAMAZINE CITRATE__trt_cp	57	2	-0.0031492	0.44782	-0.131171	0	0
BRD-K39983086__loteprednol__trt_cp	37	2	-0.00479553	0.44816	-0.13031	0	0
BRD-K38436528__IMIPRAMINE HYDROCHLORIDE__trt_cp	63	2	-0.00295748	0.448875	-0.128504	0	0
BRD-K89055274__alverine__trt_cp	36	2	-0.00303227	0.449376	-0.127238	0	0
BRD-K42870217__Imipenem__trt_cp	12	2	-0.00748182	0.449535	-0.126835	0	0
BRD-A97730597__hexylcaine__trt_cp	37	2	-0.00347068	0.452228	-0.120034	0	0
BRD-K88429204__pyrimethamine__trt_cp	163	2	-0.00270039	0.452248	-0.119983	0	0
BRD-A55913614__PRIMAQUINE DIPHOSPHATE__trt_cp	58	2	-0.00417175	0.452617	-0.119052	0	0
BRD-K18574842__6-[2-ethoxy-1-naphthamido]-penicillin__trt_cp	85	2	-0.0028689	0.453835	-0.115978	0	0
BRD-A19195498__trimipramine__trt_cp	36	2	-0.00400466	0.454059	-0.115412	0	0
BRD-K29582677__flunarizine__trt_cp	38	2	-0.00298515	0.455708	-0.111253	0	0
BRD-A33168282__Sotalol hydrochloride__trt_cp	64	2	-0.00271619	0.457085	-0.107781	0	0
BRD-K04185004__Benoxinate hydrochloride__trt_cp	43	2	-0.00269128	0.460242	-0.0998234	0	0
BRD-K18194590__mephentermine__trt_cp	36	2	-0.00253351	0.46124	-0.0973114	0	0
BRD-A14395271__MESORIDAZINE__trt_cp	269	2	-0.00150071	0.461479	-0.0967074	0	0
BRD-K34415467__TRIMETHOBENZAMIDE HYDROCHLORIDE__trt_cp	37	2	-0.00273586	0.462161	-0.0949904	0	0
BRD-K06388322__pramipexole hcl__trt_cp	37	2	-0.00284977	0.462654	-0.0937509	0	0
BRD-A64092382__mexiletine__trt_cp	36	2	-0.00229821	0.464932	-0.0880166	0	0
BRD-K86301799__DIPYRIDAMOLE__trt_cp	139	2	-0.00138834	0.464945	-0.0879822	0	0
BRD-A66229260__calcitriol__trt_cp	27	2	-0.00288056	0.466948	-0.0829439	0	0
BRD-K91315211__BETAHISTINE HYDROCHLORIDE__trt_cp	27	2	-0.00260908	0.467634	-0.0812181	0	0
BRD-A43671941__Oxprenolol hydrochloride__trt_cp	63	2	-0.00160084	0.468175	-0.0798583	0	0
BRD-A31204924__MITOTANE__trt_cp	93	2	-0.00168347	0.468198	-0.0798014	0	0
BRD-K41524689__Acetaminophen__trt_cp	11	2	-0.00424237	0.468508	-0.079021	0	0
BRD-K82624463__Prednisone__trt_cp	10	2	-0.00371317	0.469171	-0.0773541	0	0
BRD-A22684332__Procaterol hydrochloride__trt_cp	29	2	-0.00274475	0.469683	-0.0760675	0	0
BRD-A16311756__ETHOPROPAZINE HYDROCHLORIDE__trt_cp	63	2	-0.00193645	0.471721	-0.0709453	0	0
BRD-K85090592__pilocarpine__trt_cp	37	2	-0.00191298	0.472832	-0.0681528	0	0
BRD-K42098891__PROTRYPTYLINE HYDROCHLORIDE__trt_cp	46	2	-0.00183446	0.473964	-0.0653087	0	0
BRD-K30480208__Torsemide__trt_cp	64	2	-0.00117929	0.475935	-0.0603599	0	0
BRD-K68804560__Benztropine mesylate__trt_cp	11	2	-0.0027546	0.476621	-0.0586359	0	0
BRD-K37814297__Acetopromazine maleate salt__trt_cp	12	2	-0.00253641	0.477367	-0.0567624	0	0
BRD-A22844106__TENOXICAM__trt_cp	85	2	-0.00105199	0.478068	-0.0550023	0	0
BRD-A80017228__bendrofluazide__trt_cp	44	2	-0.00184794	0.478404	-0.0541608	0	0
BRD-K42348709__Cyclobenzaprine hydrochloride__trt_cp	12	2	-0.00254202	0.478514	-0.053884	0	0
BRD-K93880783__stavudine__trt_cp	90	2	-0.000925917	0.479039	-0.0525667	0	0
BRD-K37694030__doxepin__trt_cp	76	2	-0.00112287	0.482275	-0.044444	0	0
BRD-K92731339__perindopril__trt_cp	36	2	-0.00126344	0.482622	-0.0435739	0	0
BRD-A13188892__doxazosin__trt_cp	45	2	-0.000968182	0.485169	-0.0371856	0	0
BRD-K08111712__Chloramphenicol__trt_cp	10	2	-0.00167121	0.485529	-0.0362815	0	0
BRD-A22380646__pantoprazole__trt_cp	99	2	-0.000698976	0.485561	-0.0362	0	0
BRD-K15108141__gemcitabine__trt_cp	281	2	-0.00116518	0.486423	-0.0340384	0	0
BRD-A16665823__butoconazole__trt_cp	63	2	-0.000804547	0.487174	-0.0321544	0	0
BRD-K52662033__LIDOCAINE HYDROCHLORIDE__trt_cp	37	2	-0.000699738	0.490072	-0.024889	0	0
BRD-A97701745__PINDOLOL__trt_cp	90	2	-0.000568602	0.490115	-0.0247812	0	0
BRD-K18895904__olanzapine__trt_cp	48	2	-0.000729492	0.490607	-0.0235477	0	0
BRD-K37289225__clozapine__trt_cp	135	2	-0.000485713	0.490954	-0.022676	0	0
BRD-A48261811__argatroban__trt_cp	49	2	-0.000534987	0.491181	-0.0221087	0	0
BRD-A74667430__ETODOLAC__trt_cp	94	2	-0.000377149	0.491386	-0.0215926	0	0
BRD-A20126139__medrysone__trt_cp	64	2	-0.000433815	0.492068	-0.0198844	0	0
BRD-A41020680__Minocycline hydrochloride__trt_cp	10	2	-0.00100831	0.492286	-0.019338	0	0
BRD-K14036801__Roxithromycin__trt_cp	11	2	-0.000772984	0.493531	-0.0162157	0	0
BRD-A29426959__CARBINOXAMINE MALEATE__trt_cp	47	2	-0.000694767	0.493789	-0.0155697	0	0
BRD-K75699339__rizatriptan__trt_cp	72	2	-5.58388e-05	0.498982	-0.00255273	0	0
BRD-K08806317__s(-)-timolol__trt_cp	44	2	-5.08638e-05	0.499288	-0.00178497	0	0
BRD-K92657060__Zaleplon__trt_cp	12	2	0.000143719	0.501144	0.00286646	0	0
BRD-A46179541__doxapram__trt_cp	49	2	0.000139346	0.501987	0.00498155	0	0
BRD-K53737926__Amitryptiline hydrochloride__trt_cp	10	2	0.00032391	0.502521	0.00631933	0	0
BRD-K94353609__fluocinolone acetonide__trt_cp	88	2	0.000166046	0.503406	0.00853859	0	0
BRD-A50310035__Misoprostol__trt_cp	11	2	0.00112827	0.508189	0.0205287	0	0
BRD-K52989797__clomipramine__trt_cp	37	2	0.00069241	0.509443	0.0236734	0	0
BRD-K19416115__S4002__trt_cp	63	2	0.000748524	0.509481	0.0237688	0	0
BRD-K85767870__Adenosine 5'-monophosphate monohydrate__trt_cp	10	2	0.00124671	0.509853	0.0247009	0	0
BRD-K47780086__penciclovir__trt_cp	49	2	0.000792986	0.512699	0.031837	0	0
BRD-A87387433__cefpodoxime proxetil__trt_cp	36	2	0.0010539	0.51295	0.0324662	0	0
BRD-A31159102__prozac__trt_cp	45	2	0.0013063	0.51478	0.0370566	0	0
BRD-K74514084__S1035__trt_cp	65	2	0.00140626	0.51844	0.0462397	0	0
BRD-K75527158__Alendronate__trt_cp	24	2	0.0021975	0.52563	0.0642887	0	0
BRD-K92723993__Imatinib mesylate__trt_cp	46	2	0.00222838	0.526019	0.065265	0	0
BRD-K92723993__HY-50946__trt_cp	60	2	0.00191455	0.52834	0.0710982	0	0
BRD-K67043667__ALTRETAMINE__trt_cp	139	2	0.000955959	0.528762	0.0721579	0	0
BRD-K21680192__Mitoxantrone dihydrochloride__trt_cp	9	2	0.0079964	0.529855	0.0749042	0	0
BRD-K39915878__loxapine__trt_cp	73	2	0.00158215	0.530421	0.0763271	0	0
BRD-A39969961__eplerenone__trt_cp	62	2	0.00177527	0.530654	0.0769147	0	0
BRD-K23933163__Cloxacillin sodium salt__trt_cp	10	2	0.0042458	0.531467	0.078959	0	0
BRD-K43457670__Acetazolamide__trt_cp	10	2	0.00430901	0.531985	0.0802596	0	0
BRD-K34415467__trimethobenzamide__trt_cp	36	2	0.00244791	0.532889	0.0825332	0	0
BRD-A69512159__SA1443988__trt_cp	32	2	0.00256323	0.532951	0.082689	0	0
BRD-K93034159__2-chloro-2'-deoxyadenosine__trt_cp	49	2	0.00298002	0.533612	0.0843524	0	0
BRD-K54790157__trioxsalen__trt_cp	74	2	0.00168337	0.534031	0.0854075	0	0
BRD-K78113049__Enoxacin__trt_cp	11	2	0.00457636	0.53791	0.0951698	0	0
BRD-K15014948__Tranexamic acid__trt_cp	10	2	0.00519892	0.538475	0.0965931	0	0
BRD-A00993607__ALPRENOLOL__trt_cp	84	2	0.00204832	0.539513	0.0992075	0	0
BRD-K14312455__Tazobactam__trt_cp	12	2	0.00460343	0.539972	0.100364	0	0
BRD-K91315211__betahistine__trt_cp	36	2	0.00304114	0.540115	0.100723	0	0
BRD-A90515964__GUAIFENESIN__trt_cp	65	2	0.00233876	0.540791	0.102426	0	0
BRD-K82236179__Dicumarol__trt_cp	12	2	0.00539729	0.542217	0.106021	0	0
BRD-K89375097__Pirenzepine dihydrochloride__trt_cp	10	2	0.00618332	0.54277	0.107414	0	0
BRD-A01636364__Bupivacaine hydrochloride__trt_cp	10	2	0.00481469	0.54352	0.109306	0	0
BRD-A07893380__Vigabatrin__trt_cp	12	2	0.00498405	0.543715	0.109797	0	0
BRD-K38436528__tofranil__trt_cp	87	2	0.0024992	0.544049	0.11064	0	0
BRD-K32398298__alprazolam__trt_cp	37	2	0.0044154	0.544434	0.111612	0	0
BRD-K95785345__Thiamine hydrochloride__trt_cp	12	2	0.00521654	0.544546	0.111893	0	0
BRD-K88871508__S(-)-LISURIDE__trt_cp	27	2	0.00341955	0.544848	0.112654	0	0
BRD-K47631482__BROMHEXINE HYDROCHLORIDE__trt_cp	58	2	0.00307745	0.54628	0.116267	0	0
BRD-A23723433__paciltaxel__trt_cp	18	2	0.00549359	0.54741	0.119121	0	0
BRD-K52431530__Josamycin__trt_cp	10	2	0.0069497	0.547526	0.119414	0	0
BRD-A05186015__Bupropion hydrochloride__trt_cp	10	2	0.00760153	0.547684	0.119813	0	0
BRD-K64052750__Gefitinib;ZD1839__trt_cp	135	2	0.00314904	0.547889	0.120331	0	0
BRD-K39621635__artemether__trt_cp	34	2	0.00349654	0.547892	0.120337	0	0
BRD-A31800922__Procyclidine hydrochloride__trt_cp	11	2	0.00607405	0.548223	0.121172	0	0
BRD-A31159102__(+_-)-Fluoxetine hydrochloride__trt_cp	24	2	0.0046301	0.551979	0.130663	0	0
BRD-K77641333__NAPHAZOLINE HYDROCHLORIDE__trt_cp	35	2	0.00449481	0.555073	0.138489	0	0
BRD-K83896451__GLUTAMINE__trt_cp	106	2	0.00537214	0.556537	0.142194	0	0
BRD-K47192521__EPA__trt_cp	23	2	0.00637907	0.556739	0.142706	0	0
BRD-K74141488__naftifine__trt_cp	38	2	0.00379706	0.558491	0.147143	0	0
BRD-M10279501__Gentamicine sulfate__trt_cp	10	2	0.00870529	0.560095	0.151211	0	0
BRD-K62012036__Acitretin__trt_cp	22	2	0.0066737	0.560494	0.152221	0	0
BRD-A68888262__azelastine hcl__trt_cp	49	2	0.00440576	0.560517	0.152281	0	0
BRD-K13183738__pentamidine__trt_cp	36	2	0.00863091	0.560822	0.153054	0	0
BRD-K45033733__FAMCICLOVIR__trt_cp	128	2	0.00220962	0.563864	0.160773	0	0
BRD-K06878038__3-hydroxy-1,2-dimethyl-4(1h)-pyridone__trt_cp	36	2	0.00553299	0.564492	0.162367	0	0
BRD-K81528515__nilotinib__trt_cp	159	2	0.00478478	0.565116	0.163954	0	0
BRD-K53972329__Ruxolitinib;INCB018424__trt_cp	135	2	0.00325943	0.568036	0.171377	0	0
BRD-K62012036__GR-108__trt_cp	67	2	0.00407468	0.568866	0.173488	0	0
BRD-K90733503__cephalexin__trt_cp	34	2	0.00493197	0.569207	0.174355	0	0
BRD-A26384407__CHLORTHALIDONE__trt_cp	103	2	0.00321391	0.571557	0.180338	0	0
BRD-K35189033__Norgestrel-(-)-D__trt_cp	27	2	0.00569077	0.572248	0.182099	0	0
BRD-A18043272__Phensuximide__trt_cp	63	2	0.00527532	0.572517	0.182786	0	0
BRD-K00603606__TICLOPIDINE HYDROCHLORIDE__trt_cp	45	2	0.0059518	0.574455	0.187729	0	0
BRD-A97730597__Hexylcaine hydrochloride__trt_cp	37	2	0.00826435	0.576186	0.192145	0	0
BRD-K35240538__methylprednisolone__trt_cp	46	2	0.00530178	0.577104	0.194491	0	0
BRD-K75649340__Thioguanosine__trt_cp	10	2	0.0143908	0.577961	0.196679	0	0
BRD-K92723993__imatinib__trt_cp	47	2	0.00528609	0.579532	0.200695	0	0
BRD-K00532621__midazolam hcl__trt_cp	37	2	0.00638527	0.579832	0.201463	0	0
BRD-K80267133__4-aminosalicylic acid__trt_cp	11	2	0.0115005	0.580084	0.202107	0	0
BRD-A22740840__Oxytetracycline dihydrate__trt_cp	10	2	0.0105072	0.580099	0.202147	0	0
BRD-K86873305__piperacillin__trt_cp	43	2	0.00683364	0.581274	0.205155	0	0
BRD-A84134924__pancuronium__trt_cp	37	2	0.00555277	0.581534	0.205819	0	0
BRD-K81128206__Edrophonium chloride__trt_cp	10	2	0.0110314	0.58224	0.207627	0	0
BRD-K74913225__brinzolamide__trt_cp	72	2	0.00404437	0.585444	0.215841	0	0
BRD-K75641298__Metoclopramide monohydrochloride__trt_cp	10	2	0.011003	0.586626	0.218874	0	0
BRD-K93461745__buspirone__trt_cp	37	2	0.0054226	0.587553	0.221256	0	0
BRD-K85518562__cilastatin na__trt_cp	37	2	0.00677299	0.588161	0.222818	0	0
BRD-K37949327__Etidronic acid, disodium salt__trt_cp	11	2	0.0111263	0.590611	0.229118	0	0
BRD-A25234499__Glutethimide, para-amino__trt_cp	10	2	0.0117467	0.590616	0.229129	0	0
BRD-A62421304__Mepenzolate bromide__trt_cp	12	2	0.00982625	0.590668	0.229263	0	0
BRD-A31521121__methocarbamol__trt_cp	76	2	0.00495741	0.59162	0.231713	0	0
BRD-K88365400__Viomycin sulfate__trt_cp	11	2	0.0119171	0.59251	0.234006	0	0
BRD-K49669424__Bretylium tosylate__trt_cp	11	2	0.0135414	0.592808	0.234774	0	0
BRD-U94846492__Quinine hemisulfate salt monohydrate__trt_cp	149	2	0.00528078	0.593928	0.237661	0	0
BRD-K35559145__Methotrimeprazine maleat salt__trt_cp	39	2	0.00805827	0.596469	0.244218	0	0
BRD-K51095933__1,3,5(10)-estratrien-3-ol-17-one sulphate__trt_cp	37	2	0.00837661	0.596868	0.245248	0	0
BRD-A93255169__THALIDOMIDE__trt_cp	330	2	0.00310414	0.596939	0.245433	0	0
BRD-A19195498__TRIMIPRAMINE MALEATE__trt_cp	47	2	0.00864807	0.59737	0.246545	0	0
BRD-K90733503__Cephalexin monohydrate__trt_cp	10	2	0.0157488	0.598314	0.248987	0	0
BRD-A30205217__Ethotoin__trt_cp	65	2	0.00536426	0.598666	0.249895	0	0
BRD-K78431006__HY-50878__trt_cp	65	2	0.0125867	0.600427	0.254451	0	0
BRD-A67097164__isophosphamide__trt_cp	27	2	0.00818018	0.601615	0.25753	0	0
BRD-A60197193__Amisulpride__trt_cp	102	2	0.00519646	0.603394	0.262141	0	0
BRD-K75466013__Benzocaine__trt_cp	12	2	0.0138691	0.60448	0.264961	0	0
BRD-K72222507__QUINAPRIL HYDROCHLORIDE__trt_cp	46	2	0.00622325	0.605644	0.267983	0	0
BRD-K06388322__pramipexole__trt_cp	47	2	0.00789415	0.606363	0.269853	0	0
BRD-A56702968__Nystatine__trt_cp	12	2	0.0140771	0.606502	0.270213	0	0
BRD-A78322124__Dobutamine hydrochloride__trt_cp	37	2	0.00815201	0.608025	0.274176	0	0
BRD-K59058766__chlorprothixene__trt_cp	36	2	0.0119361	0.60969	0.278512	0	0
BRD-K44353683__nateglinide__trt_cp	36	2	0.00834124	0.610058	0.27947	0	0
BRD-A75935363__atracurium__trt_cp	36	2	0.0087617	0.610887	0.281631	0	0
BRD-A76528577__SA792406__trt_cp	21	2	0.0183529	0.611687	0.283719	0	0
BRD-K52075040__cerulenin__trt_cp	210	2	0.0122888	0.612112	0.284829	0	0
BRD-A44008656__DOXYLAMINE SUCCINATE__trt_cp	57	2	0.0062407	0.612608	0.286122	0	0
BRD-K92093830__doxorubicin__trt_cp	159	2	0.0148948	0.613468	0.288368	0	0
BRD-A95939040__sertaconazole__trt_cp	37	2	0.00860243	0.61406	0.289917	0	0
BRD-K21680192__mitoxantrone__trt_cp	334	2	0.0173335	0.615186	0.292862	0	0
BRD-K44227013__Ponatinib;AP24534__trt_cp	132	2	0.00913177	0.615844	0.294584	0	0
BRD-K93524252__Sulfamerazine__trt_cp	12	2	0.0139246	0.616982	0.297563	0	0
BRD-K77947974__fluspirilene__trt_cp	57	2	0.00843367	0.61713	0.297953	0	0
BRD-K99063460__Didanosine__trt_cp	10	2	0.0157137	0.617155	0.298017	0	0
BRD-A50311610__MECLIZINE HYDROCHLORIDE__trt_cp	28	2	0.00945653	0.617614	0.299221	0	0
BRD-K17674993__diflorasone__trt_cp	37	2	0.00985396	0.617917	0.300014	0	0
BRD-A99314711__Paromomycin sulfate__trt_cp	11	2	0.0149777	0.619263	0.303547	0	0
BRD-K97309399__thiothixene__trt_cp	61	2	0.0115038	0.619422	0.303964	0	0
BRD-A97437073__rosiglitazone__trt_cp	275	2	0.00590373	0.620028	0.305554	0	0
BRD-A09533288__VERAPAMIL HYDROCHLORIDE__trt_cp	206	2	0.00388222	0.620219	0.306056	0	0
BRD-K02227374__milnacipran__trt_cp	37	2	0.00928118	0.620499	0.306791	0	0
BRD-K82846253__Repaglinide__trt_cp	98	2	0.00765798	0.620724	0.307384	0	0
BRD-K97564742__PYRILAMINE MALEATE__trt_cp	36	2	0.00931594	0.623804	0.315487	0	0
BRD-K93332168__isocarboxazid__trt_cp	77	2	0.00605418	0.624764	0.318017	0	0
BRD-K17561142__AMIODARONE HYDROCHLORIDE__trt_cp	223	2	0.00788565	0.625204	0.319178	0	0
BRD-K33127281__Adapalene__trt_cp	22	2	0.0136772	0.625525	0.320023	0	0
BRD-K82357231__8-chloro-11-piperidin-4-ylidene-6,11-dihydro-5h-benzo[5,6]cyclohepta[1,2-b]pyridine__trt_cp	37	2	0.0114391	0.625957	0.321164	0	0
BRD-K08252256__Diclofenac.Na__trt_cp	22	2	0.0168322	0.627296	0.3247	0	0
BRD-K58746048__Flurandrenolide__trt_cp	12	2	0.015228	0.628795	0.328664	0	0
BRD-K10974103__diloxanide__trt_cp	36	2	0.00868474	0.629193	0.329716	0	0
BRD-K18194590__MEPHENTERMINE SULFATE__trt_cp	45	2	0.0109684	0.630401	0.332917	0	0
BRD-A49225603__TRIMEPRAZINE TARTRATE__trt_cp	51	2	0.0104439	0.631779	0.336568	0	0
BRD-K49807096__benazepril hcl__trt_cp	49	2	0.0092135	0.631981	0.337105	0	0
BRD-K63750851__mycophenolic-acid__trt_cp	31	2	0.0200875	0.632184	0.337644	0	0
BRD-K55034111__Pefloxacine__trt_cp	12	2	0.0155199	0.632675	0.338948	0	0
BRD-K57033106__tripelennamine__trt_cp	72	2	0.00920808	0.633156	0.340223	0	0
BRD-K57179821__crotamiton__trt_cp	62	2	0.00859619	0.633817	0.341981	0	0
BRD-A49160188__DONEPEZIL HYDROCHLORIDE__trt_cp	46	2	0.0100641	0.635664	0.346893	0	0
BRD-K64052750__Gefitinib__trt_cp	120	2	0.0122645	0.636087	0.348019	0	0
BRD-K38775274__dexamethasone__trt_cp	68	2	0.0123253	0.637456	0.351666	0	0
BRD-A68723818__BROMPHENIRAMINE MALEATE__trt_cp	59	2	0.00920247	0.63832	0.353973	0	0
BRD-K45330754__diethylstilbestrol__trt_cp	542	2	0.0104381	0.638404	0.354196	0	0
BRD-A30815329__felodipine__trt_cp	75	2	0.0075667	0.638462	0.354351	0	0
BRD-K84091759__Candesartan__trt_cp	11	2	0.0227005	0.638687	0.354953	0	0
BRD-K49384696__Lincomycin hydrochloride__trt_cp	10	2	0.0164013	0.639794	0.357908	0	0
BRD-K14349461__Pyridoxine hydrochloride__trt_cp	12	2	0.0179412	0.642246	0.36447	0	0
BRD-K22134346__simvastatin__trt_cp	310	2	0.0068198	0.644701	0.371052	0	0
BRD-A99939097__Carisoprodol__trt_cp	12	2	0.0193497	0.646055	0.374693	0	0
BRD-K54094468__Remoxipride hydrochloride__trt_cp	34	2	0.0140795	0.648371	0.380925	0	0
BRD-K38003476__Clocortolone pivalate__trt_cp	27	2	0.0127791	0.650083	0.385544	0	0
BRD-K66788707__fludarabine__trt_cp	99	2	0.00969575	0.651706	0.389929	0	0
BRD-K08252256__DICLOFENAC SODIUM__trt_cp	58	2	0.0125728	0.651985	0.390684	0	0
BRD-K98763141__Niflumic acid__trt_cp	10	2	0.0206579	0.652395	0.391794	0	0
BRD-A82396632__Miconazole__trt_cp	10	2	0.023793	0.652476	0.392015	0	0
BRD-K71879491__Retinoic acid, all trans __trt_cp	23	2	0.0152328	0.652874	0.393091	0	0
BRD-K04548931__epirubicin__trt_cp	26	2	0.0363717	0.653618	0.395108	0	0
BRD-K15010214__Emedastine__trt_cp	12	2	0.0184346	0.654073	0.396341	0	0
BRD-K72903603__zidovudine__trt_cp	45	2	0.00910027	0.654439	0.397334	0	0
BRD-K77641333__naphazoline__trt_cp	37	2	0.0109798	0.655532	0.400301	0	0
BRD-A34309505__Zopiclone__trt_cp	12	2	0.021386	0.658242	0.407669	0	0
BRD-K82036761__sertraline__trt_cp	73	2	0.012367	0.658466	0.408279	0	0
BRD-K99964838__Bosutinib (SKI-606)__trt_cp	17	2	0.0245292	0.66015	0.412873	0	0
BRD-A17411484__carprofen__trt_cp	74	2	0.00835098	0.66555	0.427658	0	0
BRD-A14798026__mestranol__trt_cp	66	2	0.00998864	0.667432	0.432834	0	0
BRD-K32247306__PRIMIDONE__trt_cp	137	2	0.00675526	0.671786	0.444851	0	0
BRD-K59058766__CHLORPROTHIXENE HYDROCHLORIDE__trt_cp	47	2	0.0142203	0.672339	0.446382	0	0
BRD-K68507560__DICYCLOMINE HYDROCHLORIDE__trt_cp	57	2	0.0119831	0.67522	0.454373	0	0
BRD-A13982089__(+_-)-(N,N-Dimethyl)ephedrine Iodide__trt_cp	24	2	0.0166803	0.675261	0.454488	0	0
BRD-K90885812__Propantheline bromide__trt_cp	11	2	0.0229496	0.676332	0.457467	0	0
BRD-K67637637__olopatadine hcl__trt_cp	48	2	0.0137831	0.676873	0.458972	0	0
BRD-K10974103__DILOXANIDE FUROATE__trt_cp	58	2	0.00990107	0.677057	0.459484	0	0
BRD-K73541271__Etofenamate__trt_cp	12	2	0.0207036	0.67837	0.463145	0	0
BRD-K55127134__fluphenazine__trt_cp	301	2	0.00853696	0.67916	0.465352	0	0
BRD-K05673000__dicloxacillin__trt_cp	45	2	0.0162374	0.680376	0.468751	0	0
BRD-A50684349__Fenoldopam hydrochloride__trt_cp	29	2	0.016365	0.680678	0.469597	0	0
BRD-K69688083__Pyridostigmine iodide__trt_cp	12	2	0.0217028	0.68094	0.470329	0	0
BRD-K34685430__METHYLERGONOVINE MALEATE__trt_cp	52	2	0.0120355	0.682343	0.474259	0	0
BRD-A67799922__phenoxybenzamine__trt_cp	36	2	0.0140417	0.684836	0.481265	0	0
BRD-A79981887__pro-amatine__trt_cp	89	2	0.00857655	0.685774	0.483907	0	0
BRD-K37798499__etoposide__trt_cp	35	2	0.0223961	0.687401	0.488498	0	0
BRD-K89732114__Trifluoperazine dihydrochloride__trt_cp	10	2	0.037338	0.689611	0.494747	0	0
BRD-K01663662__diphenidol__trt_cp	37	2	0.01487	0.689649	0.494857	0	0
BRD-K70401845__Erlotinib__trt_cp	11	2	0.0261744	0.690041	0.495966	0	0
BRD-K21520694__Sulfacetamide sodic hydrate__trt_cp	9	2	0.0243789	0.691066	0.498874	0	0
BRD-K64931368__Aminocaproic acid__trt_cp	11	2	0.0254221	0.691213	0.499292	0	0
BRD-K89708791__rifaximin__trt_cp	37	2	0.021527	0.691353	0.499688	0	0
BRD-K07265709__S1222__trt_cp	66	2	0.0131174	0.694037	0.507325	0	0
BRD-K63430059__METHOXSALEN__trt_cp	96	2	0.0112874	0.694177	0.507725	0	0
BRD-K52172416__anastrozole__trt_cp	60	2	0.0100657	0.694274	0.508002	0	0
BRD-K82216340__medroxyprogesterone 17-acetate__trt_cp	88	2	0.0166494	0.696174	0.513429	0	0
BRD-K17561142__amiodarone__trt_cp	68	2	0.0131758	0.697114	0.516119	0	0
BRD-K60762818__norpramin__trt_cp	43	2	0.0147456	0.697189	0.516334	0	0
BRD-K99792991__Hexachlorophene__trt_cp	23	2	0.0281585	0.697271	0.516569	0	0
BRD-K89055274__ALVERINE CITRATE__trt_cp	26	2	0.016569	0.697281	0.516596	0	0
BRD-A99117172__Hydroxychloroquine sulfate__trt_cp	10	2	0.0315572	0.699397	0.522668	0	0
BRD-K15933101__ROPINIROLE__trt_cp	77	2	0.0131076	0.699749	0.523678	0	0
BRD-K00603606__ticlopidine hcl__trt_cp	35	2	0.0193872	0.702259	0.53091	0	0
BRD-K43544024__Oxandrolone__trt_cp	10	2	0.0278222	0.702352	0.531178	0	0
BRD-A01320529__salmeterol__trt_cp	120	2	0.0119918	0.703146	0.533471	0	0
BRD-K87116849__Cephalothin sodium salt__trt_cp	12	2	0.0309206	0.703262	0.533805	0	0
BRD-K34441861__moexipril__trt_cp	38	2	0.0130006	0.703544	0.53462	0	0
BRD-K02992638__lamivudine__trt_cp	95	2	0.00944413	0.703735	0.535175	0	0
BRD-K56851771__enzalutamide__trt_cp	15	2	0.0321581	0.703904	0.535661	0	0
BRD-K34441861__Moexipril hydrochloride__trt_cp	33	2	0.0152043	0.705252	0.539567	0	0
BRD-K59935627__Ceftazidime pentahydrate__trt_cp	11	2	0.0314685	0.706741	0.543887	0	0
BRD-K24844714__5-fluorouracil__trt_cp	37	2	0.0179881	0.708777	0.549815	0	0
BRD-K78431006__PF02341066_Crizotinib__trt_cp	180	2	0.012015	0.709313	0.55138	0	0
BRD-K72029282__probucol__trt_cp	76	2	0.0112853	0.709363	0.551524	0	0
BRD-K44779798__miglitol__trt_cp	46	2	0.0150279	0.709393	0.551613	0	0
BRD-K35483542__9-cis Retinoic acid __trt_cp	22	2	0.0200864	0.709517	0.551973	0	0
BRD-K64052750__HY-50895__trt_cp	67	2	0.0196756	0.709887	0.553054	0	0
BRD-K10843433__phenylbutazone__trt_cp	74	2	0.0105991	0.710226	0.554044	0	0
BRD-K06335600__Tizanidine HCl__trt_cp	12	2	0.0239433	0.710745	0.555564	0	0
BRD-K66175015__S1011__trt_cp	59	2	0.0257124	0.710914	0.556056	0	0
BRD-K81418486__SAHA__trt_cp	307	2	0.0201371	0.710999	0.556305	0	0
BRD-K13296708__SR 141716__trt_cp	24	2	0.027652	0.711978	0.559172	0	0
BRD-K73323637__(+) -Levobunolol hydrochloride__trt_cp	11	2	0.0277776	0.716007	0.571019	0	0
BRD-K37694030__DOXEPIN HYDROCHLORIDE__trt_cp	47	2	0.0167419	0.716319	0.571942	0	0
BRD-K81528515__Nilotinib;AMN-107__trt_cp	134	2	0.011815	0.716922	0.573723	0	0
BRD-K01228321__cisplatin__trt_cp	108	2	0.0178616	0.717297	0.574832	0	0
BRD-K90333595__PHENTOLAMINE HYDROCHLORIDE__trt_cp	37	2	0.0164974	0.720505	0.584342	0	0
BRD-A53952395__prilocaine__trt_cp	44	2	0.0147777	0.72088	0.585458	0	0
BRD-A71157293__Fursultiamine Hydrochloride__trt_cp	53	2	0.0131499	0.721725	0.587974	0	0
BRD-K89732114__Trifluoperazine.2HCl__trt_cp	22	2	0.0281843	0.722166	0.589289	0	0
BRD-A50311610__meclozine__trt_cp	37	2	0.0165163	0.722598	0.590577	0	0
BRD-A31159102__Fluoxetine hydrochloride__trt_cp	64	2	0.0166173	0.722601	0.590586	0	0
BRD-K17016787__estriol__trt_cp	355	2	0.0105758	0.722647	0.590724	0	0
BRD-K52020312__metronidazole__trt_cp	36	2	0.0186516	0.723214	0.592417	0	0
BRD-K04548931__pidorubicine__trt_cp	27	2	0.0454361	0.723749	0.594014	0	0
BRD-K48722833__S1483__trt_cp	64	2	0.0145061	0.724438	0.596076	0	0
BRD-K71103788__duloxetine hcl__trt_cp	48	2	0.0195507	0.724703	0.59687	0	0
BRD-K08547377__CPT 11__trt_cp	29	2	0.030326	0.725283	0.59861	0	0
BRD-K89839824__S1192__trt_cp	63	2	0.0190709	0.725303	0.59867	0	0
BRD-K37991163__paroxetine__trt_cp	69	2	0.0177514	0.726303	0.601669	0	0
BRD-K08547377__Irinotecan hydrochloride trihydrate__trt_cp	12	2	0.0376099	0.726675	0.602786	0	0
BRD-K48300629__Zonisamide__trt_cp	65	2	0.0119945	0.727036	0.603874	0	0
BRD-K41903098__diphenoxylate__trt_cp	37	2	0.0219377	0.727719	0.605928	0	0
BRD-A22684332__procaterol__trt_cp	61	2	0.0188145	0.729005	0.609807	0	0
BRD-K73947551__AMIFOSTINE__trt_cp	119	2	0.019775	0.729528	0.611387	0	0
BRD-A46335897__Promethazine hydrochloride__trt_cp	174	2	0.00873416	0.729548	0.611448	0	0
BRD-K53972329__CT-INCB__trt_cp	67	2	0.0228591	0.729806	0.612228	0	0
BRD-K43389675__DAUNORUBICIN__trt_cp	115	2	0.0481255	0.730731	0.615024	0	0
BRD-K62200014__anagrelide__trt_cp	36	2	0.0181915	0.731178	0.61638	0	0
BRD-K09631521__THIOTEPA__trt_cp	83	2	0.0192391	0.733659	0.623916	0	0
BRD-K40758068__efavirenz__trt_cp	47	2	0.0167621	0.733676	0.62397	0	0
BRD-K75699339__RIZATRIPTAN BENZOATE__trt_cp	47	2	0.0183291	0.735551	0.62969	0	0
BRD-K53737926__AMITRIPTYLINE HYDROCHLORIDE__trt_cp	27	2	0.0231468	0.737415	0.635396	0	0
BRD-K17306061__S1189__trt_cp	63	2	0.0141698	0.73876	0.639527	0	0
BRD-K59058747__Acetylcysteine__trt_cp	10	2	0.0441509	0.73898	0.640203	0	0
BRD-A27887842__PREDNISOLONE__trt_cp	80	2	0.0141546	0.742068	0.649735	0	0
BRD-K23984367__S1040__trt_cp	64	2	0.0259838	0.742348	0.6506	0	0
BRD-K99621550__tubocurarine__trt_cp	36	2	0.024249	0.744249	0.656502	0	0
BRD-A77291778__CYCLOPENTOLATE HYDROCHLORIDE__trt_cp	57	2	0.0152241	0.744282	0.656603	0	0
BRD-K62310379__fluticasone__trt_cp	76	2	0.0161228	0.747466	0.666537	0	0
BRD-K57545991__ENALAPRIL MALEATE__trt_cp	145	2	0.0192868	0.748212	0.668874	0	0
BRD-K99107520__felbamate__trt_cp	104	2	0.0127828	0.749697	0.673536	0	0
BRD-K92731339__PERINDOPRIL ERBUMINE__trt_cp	47	2	0.0202359	0.750885	0.677277	0	0
BRD-K06980535__PROMAZINE HYDROCHLORIDE__trt_cp	226	2	0.0167962	0.750998	0.677633	0	0
BRD-A07765530__Racepinephrine HCl__trt_cp	11	2	0.0385025	0.752247	0.681579	0	0
BRD-K00673382__famotidine__trt_cp	45	2	0.0194972	0.75656	0.695279	0	0
BRD-K54770957__Etoricoxib__trt_cp	12	2	0.0368481	0.757238	0.697446	0	0
BRD-A02990301__Lofexidine__trt_cp	12	2	0.0340013	0.75769	0.698892	0	0
BRD-K79254416__A3656__trt_cp	63	2	0.017264	0.757743	0.699062	0	0
BRD-K92778217__MEFENAMIC ACID__trt_cp	38	2	0.0222623	0.758071	0.700112	0	0
BRD-K15891719__T018500__trt_cp	45	2	0.0337884	0.758381	0.701103	0	0
BRD-K30240666__CLEMASTINE__trt_cp	85	2	0.0201639	0.75871	0.702159	0	0
BRD-A62025033__temsirolimus [CI779]__trt_cp	173	2	0.0364555	0.763819	0.718642	0	0
BRD-A31801025__formestane__trt_cp	61	2	0.0157364	0.7639	0.718905	0	0
BRD-K28183345__CHLOROGUANIDE HYDROCHLORIDE__trt_cp	27	2	0.0278871	0.764108	0.71958	0	0
BRD-A23034328__Clindamycin hydrochloride__trt_cp	10	2	0.0307045	0.764488	0.720813	0	0
BRD-A02759312__Betaxolol hydrochloride__trt_cp	73	2	0.01348	0.764694	0.721484	0	0
BRD-K11399644__phenformin__trt_cp	38	2	0.0219712	0.764827	0.721915	0	0
BRD-K66615216__S1465__trt_cp	65	2	0.0240084	0.765473	0.724019	0	0
BRD-K06895174__Cisapride__trt_cp	120	2	0.0140958	0.766282	0.726657	0	0
BRD-K09416995__Lovastatin__trt_cp	181	2	0.016505	0.767192	0.729631	0	0
BRD-K01095011__finasteride__trt_cp	98	2	0.0108857	0.767541	0.730772	0	0
BRD-A83892713__rifampicin__trt_cp	44	2	0.0224214	0.767762	0.731498	0	0
BRD-K28143534__Cyproheptadine hydrochloride__trt_cp	10	2	0.0460959	0.768176	0.732853	0	0
BRD-A60571864__BUDESONIDE__trt_cp	85	2	0.0142134	0.768456	0.733771	0	0
BRD-K50938786__ropivacaine hcl__trt_cp	48	2	0.0179228	0.769311	0.73658	0	0
BRD-A05186015__BUPROPION__trt_cp	119	2	0.0120911	0.769806	0.738207	0	0
BRD-K08924299__palonosetron hcl__trt_cp	49	2	0.0224437	0.769995	0.738829	0	0
BRD-K56343971__HY-10247__trt_cp	66	2	0.028374	0.771356	0.743321	0	0
BRD-A67799922__PHENOXYBENZAMINE HYDROCHLORIDE__trt_cp	26	2	0.0246011	0.7714	0.743467	0	0
BRD-A99633051__Ethosuximide__trt_cp	10	2	0.0443001	0.772273	0.746354	0	0
BRD-A80908310__Cloperastine hydrochloride__trt_cp	12	2	0.0339732	0.772367	0.746663	0	0
BRD-K92093830__Doxorubicin hydrochloride__trt_cp	31	2	0.0574995	0.773969	0.751983	0	0
BRD-K60511616__Pravastatin sodium salt__trt_cp	27	2	0.0310138	0.775312	0.756455	0	0
BRD-K60038276__IRBESARTAN__trt_cp	120	2	0.0138972	0.776904	0.76178	0	0
BRD-K21548250__Moricizine hydrochloride__trt_cp	64	2	0.0168817	0.776935	0.761884	0	0
BRD-A29260609__acebutolol__trt_cp	43	2	0.0183863	0.7789	0.768485	0	0
BRD-K13183738__Pentamidine isethionate__trt_cp	12	2	0.0414997	0.779307	0.769855	0	0
BRD-A48720949__testosterone__trt_cp	36	2	0.0223336	0.779631	0.770949	0	0
BRD-K66404838__Nalbuphine hydrochloride__trt_cp	63	2	0.0175474	0.780071	0.772433	0	0
BRD-K59197931__naproxen__trt_cp	48	2	0.0215648	0.780843	0.775045	0	0
BRD-K70330367__amantadine__trt_cp	36	2	0.0208668	0.781027	0.775668	0	0
BRD-A39390670__Rabeprazole Sodium salt__trt_cp	11	2	0.0385101	0.781551	0.777443	0	0
BRD-K97564742__mepyramine__trt_cp	36	2	0.0233846	0.782706	0.781366	0	0
BRD-K56558538__Ambroxol hydrochloride__trt_cp	56	2	0.0180394	0.78303	0.782468	0	0
BRD-A97437073__rosiglitazone hcl__trt_cp	37	2	0.0240629	0.78311	0.782741	0	0
BRD-K71499074__diclofenamide__trt_cp	39	2	0.0228891	0.78613	0.793066	0	0
BRD-K40530731__Hyoscyamine (L)__trt_cp	28	2	0.0238432	0.787293	0.797064	0	0
BRD-K46862739__Metyrapone__trt_cp	63	2	0.0209182	0.789022	0.803031	0	0
BRD-K79254416__5-Aza-2-deoxycytidine__trt_cp	23	2	0.0307659	0.789096	0.803288	0	0
BRD-K45158365__valsartan__trt_cp	98	2	0.0136499	0.790567	0.80839	0	0
BRD-K64052750__S1025__trt_cp	65	2	0.0207653	0.790875	0.809462	0	0
BRD-K16444452__ibudilast__trt_cp	82	2	0.0157336	0.791083	0.810183	0	0
BRD-A58048407__nimodipine__trt_cp	289	2	0.0120492	0.791245	0.810747	0	0
BRD-K81272440__Dantrolene, sodium salt__trt_cp	29	2	0.0267401	0.791276	0.810857	0	0
BRD-A80869209__Ticarcillin sodium__trt_cp	11	2	0.0500652	0.793083	0.817164	0	0
BRD-K28494619__Sulfamethoxazole__trt_cp	10	2	0.047501	0.793494	0.818605	0	0
BRD-K01612348__meropenem__trt_cp	81	2	0.018145	0.793629	0.819078	0	0
BRD-K81418486__SAHA__trt_poscon	12	2	0.06497	0.794859	0.823398	0	0
BRD-K08619574__thioproperazine__trt_cp	35	2	0.0278246	0.795041	0.824039	0	0
BRD-K69470111__montelukast na__trt_cp	37	2	0.0280486	0.795357	0.825149	0	0
BRD-K98530306__CLONIDINE HYDROCHLORIDE__trt_cp	220	2	0.0129292	0.795516	0.825713	0	0
BRD-K46937689__phenazone__trt_cp	71	2	0.0192609	0.796192	0.828097	0	0
BRD-K23984367__Sorafenib tosylate__trt_cp	23	2	0.0434025	0.798131	0.834963	0	0
BRD-K04218075__Clomiphene citrate (Z,E)__trt_cp	27	2	0.0279052	0.798678	0.836907	0	0
BRD-A95939040__Sertaconazole nitrate__trt_cp	44	2	0.0255917	0.800276	0.842607	0	0
BRD-A94709349__metaxalone__trt_cp	62	2	0.0214952	0.800748	0.844298	0	0
BRD-K91263825__Nortriptyline hydrochloride__trt_cp	10	2	0.0382322	0.800756	0.844326	0	0
BRD-K46435977__Valacyclovir hydrochloride__trt_cp	12	2	0.0427885	0.801031	0.845309	0	0
BRD-A97104540__fenoterol__trt_cp	38	2	0.0226738	0.801904	0.848443	0	0
BRD-K72093121__Vidarabine__trt_cp	12	2	0.0446742	0.802171	0.849401	0	0
BRD-A29485665__bicalutamide__trt_cp	125	2	0.0145016	0.802733	0.851422	0	0
BRD-K32744045__Disulfiram__trt_cp	10	2	0.0557938	0.802869	0.851915	0	0
BRD-K25650355__physostigmine__trt_cp	36	2	0.02682	0.803583	0.854489	0	0
BRD-K88172511__Naltrexone hydrochloride dihydrate__trt_cp	61	2	0.0182216	0.803687	0.854864	0	0
BRD-K28849549__Mesalamine__trt_cp	10	2	0.0385091	0.803779	0.855199	0	0
BRD-M61246020__Fenoprofen calcium salt dihydrate__trt_cp	12	2	0.0441533	0.807144	0.867419	0	0
BRD-K20141153__atomoxetine hcl__trt_cp	36	2	0.0294266	0.807523	0.868805	0	0
BRD-K08547377__irinotecan hcl )trihydrate)__trt_cp	36	2	0.0403112	0.80788	0.870111	0	0
BRD-K45252063__CLOFIBRATE__trt_cp	93	2	0.0174518	0.808754	0.873313	0	0
BRD-K33226500__indinavir__trt_cp	36	2	0.0243186	0.81022	0.878706	0	0
BRD-K81528515__HY-10159__trt_cp	66	2	0.0359002	0.810563	0.879974	0	0
BRD-A87606379__NADOLOL__trt_cp	138	2	0.0150084	0.813548	0.891048	0	0
BRD-A42167015__carteolol__trt_cp	36	2	0.0250787	0.813913	0.892407	0	0
BRD-K35189033__levonorgestrel__trt_cp	75	2	0.0203422	0.814583	0.894912	0	0
BRD-K36862742__hydroflumethiazide__trt_cp	54	2	0.0247699	0.815115	0.896903	0	0
BRD-K54262262__Monobenzone__trt_cp	11	2	0.0440556	0.817644	0.906424	0	0
BRD-A48720949__TESTOSTERONE PROPIONATE__trt_cp	27	2	0.0400779	0.817916	0.907451	0	0
BRD-A80017228__BENDROFLUMETHIAZIDE__trt_cp	96	2	0.0167006	0.818527	0.909765	0	0
BRD-K18673820__Folic acid__trt_cp	12	2	0.042485	0.818576	0.909953	0	0
BRD-K18574842__Nafcillin sodium salt monohydrate__trt_cp	27	2	0.0237863	0.820249	0.916315	0	0
BRD-A34817987__itraconazole__trt_cp	223	2	0.0148277	0.822064	0.923259	0	0
BRD-K42260897__ezetimibe__trt_cp	37	2	0.0274727	0.822507	0.924961	0	0
BRD-K20152659__DIHOMO-GAMMA-LINOLENIC ACID__trt_cp	52	2	0.0349919	0.823313	0.928063	0	0
BRD-K90333595__phentolamine__trt_cp	36	2	0.0268224	0.823896	0.930313	0	0
BRD-K09859624__Methantheline bromide__trt_cp	38	2	0.0262906	0.825037	0.934733	0	0
BRD-K04548931__EPIRUBICIN HYDROCHLORIDE__trt_cp	32	2	0.0846181	0.825127	0.935084	0	0
BRD-M18219129__Guanethidine sulfate__trt_cp	10	2	0.0557715	0.825563	0.936774	0	0
BRD-K17674993__Diflorasone Diacetate__trt_cp	27	2	0.0508113	0.827085	0.942709	0	0
BRD-A02006392__NITRENDIPINE__trt_cp	288	2	0.012101	0.827416	0.944005	0	0
BRD-K83144676__olmesartan medoxomil__trt_cp	37	2	0.0319647	0.827752	0.945318	0	0
BRD-K25433859__maprotiline__trt_cp	37	2	0.043945	0.827769	0.945386	0	0
BRD-K86434416__selegiline__trt_cp	37	2	0.0316092	0.828337	0.947615	0	0
BRD-K30649484__4-(aminomethyl)benzenesulfonamide__trt_cp	45	2	0.0338725	0.828846	0.949616	0	0
BRD-K13514097__S1120__trt_cp	58	2	0.0609449	0.830215	0.955016	0	0
BRD-K99964838__S1014__trt_cp	66	2	0.0378325	0.831131	0.958645	0	0
BRD-A04756508__NORGESTIMATE__trt_cp	81	2	0.0261991	0.831767	0.961172	0	0
BRD-K66876909__PZ0014__trt_cp	63	2	0.0287821	0.831785	0.961242	0	0
BRD-K69650333__idarubicin hcl__trt_cp	29	2	0.0806645	0.832531	0.964215	0	0
BRD-A60274948__Bromocryptine mesylate__trt_cp	53	2	0.0248624	0.833423	0.967782	0	0
BRD-K55191674__benzylpenicillin__trt_cp	35	2	0.0281635	0.8351	0.974517	0	0
BRD-A57382968__PIROXICAM__trt_cp	128	2	0.0158272	0.835739	0.977095	0	0
BRD-K85925969__2',3'-dideoxycytidine__trt_cp	37	2	0.0299077	0.836457	0.979999	0	0
BRD-K59037100__oxybenzone__trt_cp	77	2	0.0186347	0.836609	0.980614	0	0
BRD-A69512159__carbidopa__trt_cp	45	2	0.0385767	0.836705	0.981004	0	0
BRD-A86044036__flurbiprofen__trt_cp	91	2	0.0191454	0.837213	0.983067	0	0
BRD-K90789829__nefazodone__trt_cp	73	2	0.0211558	0.837358	0.983658	0	0
BRD-K56614220__clofazimine__trt_cp	44	2	0.0262947	0.837532	0.984367	0	0
BRD-K09963420__Saquinavir mesylate__trt_cp	32	2	0.0285755	0.837976	0.986174	0	0
BRD-K30020243__ALISKIREN HEMIFUMARATE__trt_cp	47	2	0.0264041	0.838152	0.986892	0	0
BRD-K96471533__nitazoxanide__trt_cp	37	2	0.0351541	0.838164	0.98694	0	0
BRD-A50311610__Meclozine dihydrochloride__trt_cp	12	2	0.049231	0.838232	0.987217	0	0
BRD-K79116891__proxymetacaine__trt_cp	122	2	0.0177452	0.838797	0.989526	0	0
BRD-K70578146__dactinomycin__trt_cp	38	2	0.0818169	0.839796	0.993619	0	0
BRD-K32164935__TOLAZAMIDE__trt_cp	353	2	0.0133278	0.839816	0.993702	0	0
BRD-K57631554__aminolevulinic acid__trt_cp	44	2	0.0272975	0.839929	0.994167	0	0
BRD-A97674275__ranolazine__trt_cp	109	2	0.0163067	0.84016	0.995117	0	0
BRD-K24473282__(-)-Isoproterenol hydrochloride__trt_cp	11	2	0.0463541	0.840265	0.995547	0	0
BRD-K81418486__vorinostat__trt_cp	1303	2	0.0439489	0.840356	0.995923	0	0
BRD-K81855038__roxatidine hcl__trt_cp	37	2	0.0292254	0.841229	0.999523	0	0
BRD-A92670106__Tocainide hydrochloride__trt_cp	63	2	0.0258899	0.841927	1.00241	0	0
BRD-A02990301__lofexidine hcl__trt_cp	48	2	0.0222548	0.842122	1.00322	0	0
BRD-K01292756__Pimozide__trt_cp	266	2	0.0282464	0.842524	1.00489	0	0
BRD-A76229785__Lymecycline__trt_cp	11	2	0.0494068	0.842794	1.00601	0	0
BRD-K30240666__Clemastine fumarate__trt_cp	10	2	0.0458314	0.843079	1.00719	0	0
BRD-K52930707__rescinnamine__trt_cp	39	2	0.0271111	0.84335	1.00832	0	0
BRD-K18910433__estradiol__trt_cp	813	2	0.0172838	0.845129	1.01576	0	0
BRD-K99451608__L469480__trt_cp	67	2	0.024877	0.845457	1.01714	0	0
BRD-K47278471__diphenhydramine__trt_cp	37	2	0.031694	0.845581	1.01766	0	0
BRD-K82562631__TOLMETIN SODIUM__trt_cp	45	2	0.0254789	0.845642	1.01792	0	0
BRD-K16195444__Oxymetazoline hydrochloride__trt_cp	27	2	0.0431629	0.846614	1.02202	0	0
BRD-K82562631__Tolmetin sodium salt dihydrate__trt_cp	11	2	0.0521725	0.846746	1.02258	0	0
BRD-A38161572__Atovaquone__trt_cp	12	2	0.0490196	0.848644	1.03063	0	0
BRD-K87202646__isoniazid__trt_cp	27	2	0.0319024	0.848838	1.03146	0	0
BRD-K02637541__CELECOXIB__trt_cp	156	2	0.0174928	0.849356	1.03368	0	0
BRD-K97810537__Beclomethasone dipropionate__trt_cp	28	2	0.039559	0.849688	1.0351	0	0
BRD-A10977446__SA792982__trt_cp	24	2	0.0409658	0.84994	1.03618	0	0
BRD-A51714012__venlafaxine hcl__trt_cp	37	2	0.031042	0.851136	1.04132	0	0
BRD-A19661776__Mianserin hydrochloride__trt_cp	28	2	0.0330155	0.851906	1.04464	0	0
BRD-K93461745__BUSPIRONE HYDROCHLORIDE__trt_cp	47	2	0.0235053	0.852345	1.04655	0	0
BRD-K55696337__topotecan hcl__trt_cp	23	2	0.0760241	0.853812	1.05292	0	0
BRD-K12437696__Aztreonam__trt_cp	10	2	0.058323	0.854633	1.05651	0	0
BRD-M59543297__Isometheptene mucate__trt_cp	11	2	0.0568275	0.854765	1.05709	0	0
BRD-A74980173__SA1444140__trt_cp	23	2	0.0437316	0.854817	1.05732	0	0
BRD-K13926615__vardenafil__trt_cp	85	2	0.0196094	0.85586	1.0619	0	0
BRD-K47278471__Diphenhydramine hydrochloride__trt_cp	10	2	0.0510187	0.857463	1.06899	0	0
BRD-A65280694__moban__trt_cp	45	2	0.0265902	0.857621	1.06969	0	0
BRD-K32814891__(+_-)-Reboxetine mesylate__trt_cp	23	2	0.0525383	0.858668	1.07435	0	0
BRD-A19661776__Mianserine hydrochloride__trt_cp	10	2	0.0605535	0.859029	1.07597	0	0
BRD-A26334849__propafenone__trt_cp	36	2	0.0282726	0.859312	1.07723	0	0
BRD-A69512159__(+_-)-2-(3,4-Dihydroxybenzyl)-2-hydrazinopropionic acid__trt_cp	24	2	0.03487	0.862279	1.09062	0	0
BRD-K48300629__Adapiprazine dihydrochloride__trt_cp	22	2	0.0516918	0.862849	1.09321	0	0
BRD-A22256192__terazosin__trt_cp	83	2	0.0224646	0.862933	1.09359	0	0
BRD-K25433859__MAPROTILINE HYDROCHLORIDE__trt_cp	29	2	0.0420483	0.863095	1.09433	0	0
BRD-K21283037__riluzole__trt_cp	96	2	0.0178507	0.863308	1.0953	0	0
BRD-K13926615__VARDENAFIL HYDROCHLORIDE__trt_cp	26	2	0.037849	0.863556	1.09644	0	0
BRD-K49404994__levetiracetam__trt_cp	49	2	0.0297637	0.86376	1.09737	0	0
BRD-K88625236__nonoxynol-9__trt_cp	63	2	0.0459119	0.8647	1.10168	0	0
BRD-A91008255__bepridil__trt_cp	37	2	0.0334939	0.864803	1.10216	0	0
BRD-K33453211__levocabastine__trt_cp	32	2	0.0363571	0.866083	1.10806	0	0
BRD-K08252256__diclofenac__trt_cp	39	2	0.0461031	0.866496	1.10998	0	0
BRD-A87848830__bimatoprost__trt_cp	44	2	0.032587	0.86669	1.11088	0	0
BRD-A19736161__ondansetron__trt_cp	83	2	0.0220538	0.86677	1.11125	0	0
BRD-K12219985__glipizide__trt_cp	118	2	0.0220113	0.867894	1.11649	0	0
BRD-K32744045__tetraethylthiuram disulfide__trt_cp	36	2	0.0396615	0.868423	1.11897	0	0
BRD-K79602928__metformin__trt_cp	189	2	0.0261099	0.869722	1.12508	0	0
BRD-K31682896__Sulfamethizole__trt_cp	12	2	0.0618722	0.869955	1.12618	0	0
BRD-K59456551__Methotrexate__trt_cp	10	2	0.0729825	0.870039	1.12658	0	0
BRD-K70401845__HY-50896__trt_cp	67	2	0.0340671	0.870173	1.12721	0	0
BRD-K54094468__remoxipride__trt_cp	38	2	0.0279722	0.870735	1.12987	0	0
BRD-K56429665__Calcipotriol__trt_cp	90	2	0.0311511	0.871109	1.13165	0	0
BRD-K22031190__DIFLUNISAL__trt_cp	131	2	0.0226313	0.872953	1.14046	0	0
BRD-K83597974__PARGYLINE HYDROCHLORIDE__trt_cp	39	2	0.0298713	0.873495	1.14307	0	0
BRD-K41260949__Sodium Valproate__trt_cp	45	2	0.0500959	0.873771	1.1444	0	0
BRD-K77947974__Fluspirilen__trt_cp	219	2	0.0321931	0.874258	1.14675	0	0
BRD-K87156652__Carbimazole__trt_cp	12	2	0.0718893	0.874511	1.14798	0	0
BRD-K07237224__4-chloro-n-(2-morpholin-4-yl-ethyl)-benzamide__trt_cp	37	2	0.0414643	0.875942	1.15494	0	0
BRD-K84036904__methyltestosterone__trt_cp	37	2	0.0447321	0.876081	1.15561	0	0
BRD-K03406345__5-azacytidine__trt_cp	44	2	0.0641177	0.877245	1.16133	0	0
BRD-A45889380__QUINACRINE HYDROCHLORIDE__trt_cp	206	2	0.0637098	0.879601	1.173	0	0
BRD-K33425534__exemestane__trt_cp	37	2	0.0451159	0.880113	1.17555	0	0
BRD-A07395371__esmolol__trt_cp	36	2	0.0417658	0.881397	1.182	0	0
BRD-A48180038__Trihexyphenidyl-D,L Hydrochloride__trt_cp	12	2	0.057739	0.881467	1.18235	0	0
BRD-K78692225__leflunomide__trt_cp	81	2	0.0360695	0.881953	1.18481	0	0
BRD-A28940325__Trichlormethiazide__trt_cp	11	2	0.0610675	0.882483	1.18749	0	0
BRD-K23204545__busulfan__trt_cp	54	2	0.0319796	0.88273	1.18875	0	0
BRD-K02867583__MINAPRINE HYDROCHLORIDE__trt_cp	53	2	0.0316834	0.88326	1.19144	0	0
BRD-K67261995__Iodipamide__trt_cp	44	2	0.030482	0.883716	1.19377	0	0
BRD-K72093121__adenine 9-beta;-d-arabinofuranoside__trt_cp	45	2	0.0317692	0.885282	1.20181	0	0
BRD-K76205745__losartan__trt_cp	70	2	0.0229505	0.885368	1.20226	0	0
BRD-K63675182__triflupromazine__trt_cp	179	2	0.0482364	0.886863	1.21001	0	0
BRD-K16195444__oxymetazoline__trt_cp	37	2	0.0394767	0.886991	1.21068	0	0
BRD-K54006094__formoterol__trt_cp	36	2	0.0385448	0.887088	1.21119	0	0
BRD-K41260949__valproic acid__trt_cp	271	2	0.0167655	0.887184	1.21169	0	0
BRD-K00603606__ticlopidine__trt_cp	36	2	0.0345869	0.887384	1.21273	0	0
BRD-K29530284__amlexanox__trt_cp	37	2	0.0432052	0.889592	1.22436	0	0
BRD-K90027355__spironolactone__trt_cp	113	2	0.0234305	0.890352	1.2284	0	0
BRD-A51820102__econazole__trt_cp	36	2	0.0402406	0.891031	1.23203	0	0
BRD-A65282128__cefazolin__trt_cp	45	2	0.0282467	0.891624	1.23521	0	0
BRD-A82371568__clofarabine__trt_cp	69	2	0.0502897	0.892659	1.24079	0	0
BRD-A64977602__mirtazapine__trt_cp	84	2	0.0294579	0.892776	1.24143	0	0
BRD-K70487031__cis-(Z)-FLUPENTHIXOL__trt_cp	27	2	0.0484323	0.893027	1.24279	0	0
BRD-K52459643__Alprostadil__trt_cp	29	2	0.0393446	0.893742	1.24668	0	0
BRD-K69688083__mestinon__trt_cp	89	2	0.027767	0.893757	1.24676	0	0
BRD-K68620903__dydrogesterone__trt_cp	72	2	0.0257346	0.894177	1.24905	0	0
BRD-K88789588__Letrozole__trt_cp	99	2	0.0236567	0.896247	1.26046	0	0
BRD-K79501723__Cyclizine hydrochloride__trt_cp	12	2	0.063841	0.896527	1.26201	0	0
BRD-K97158071__DROPERIDOL__trt_cp	120	2	0.0213676	0.897092	1.26516	0	0
BRD-K77987382__mebendazole__trt_poscon	167	2	0.0573782	0.898429	1.27265	0	0
BRD-A03061970__Alizapride HCl__trt_cp	12	2	0.0568907	0.900315	1.28335	0	0
BRD-A50684349__fenoldopam__trt_cp	74	2	0.0261363	0.901222	1.28854	0	0
BRD-K96354014__nifedipine__trt_cp	244	2	0.0269575	0.901558	1.29048	0	0
BRD-K09951645__dabrafenib__trt_cp	143	2	0.0737267	0.902989	1.29877	0	0
BRD-K16508793__diazepam__trt_cp	70	2	0.0268325	0.903703	1.30295	0	0
BRD-A23359898__sibutramine__trt_cp	30	2	0.0365684	0.903896	1.30408	0	0
BRD-A64092382__MEXILETINE HYDROCHLORIDE__trt_cp	46	2	0.0319547	0.904205	1.30589	0	0
BRD-A22256192__Terazosin hydrochloride__trt_cp	12	2	0.0628581	0.904445	1.3073	0	0
BRD-K47192521__EICOSAPENTAENOIC ACID (20_5 n-3)__trt_cp	53	2	0.0283001	0.904496	1.3076	0	0
BRD-K55395145__LY-231514__trt_cp	165	2	0.0218164	0.904679	1.30868	0	0
BRD-K43887077__dopamine__trt_cp	37	2	0.0393181	0.905062	1.31094	0	0
BRD-K77554836__triamcinolone__trt_cp	64	2	0.0301693	0.905283	1.31225	0	0
BRD-A61793559__METOLAZONE__trt_cp	93	2	0.0233902	0.905309	1.31241	0	0
BRD-K42693031__glimepiride__trt_cp	65	2	0.0330937	0.906087	1.31704	0	0
BRD-K32107296__temozolomide__trt_cp	346	2	0.0229375	0.907199	1.3237	0	0
BRD-K88871508__lisuride__trt_cp	38	2	0.0367644	0.907225	1.32386	0	0
BRD-A65051990__Acenocoumarol__trt_cp	12	2	0.0654892	0.907893	1.32789	0	0
BRD-A03216249__mepivacaine__trt_cp	48	2	0.0365194	0.908353	1.33068	0	0
BRD-K89923877__scopolamine__trt_cp	38	2	0.0355205	0.908398	1.33095	0	0
BRD-K26521938__PGE2__trt_cp	23	2	0.0518949	0.90874	1.33303	0	0
BRD-K86204871__terconazole__trt_cp	77	2	0.0298726	0.909467	1.33748	0	0
BRD-K31283835__S5001__trt_cp	63	2	0.0291902	0.909569	1.33811	0	0
BRD-K08273968__griseofulvin__trt_cp	54	2	0.0436058	0.910723	1.34522	0	0
BRD-A48430263__pioglitazone__trt_cp	69	2	0.0266722	0.912596	1.35691	0	0
BRD-K11399644__Phenformin hydrochloride__trt_cp	61	2	0.0414805	0.912806	1.35824	0	0
BRD-K63343048__orlistat__trt_cp	37	2	0.0510492	0.914029	1.36599	0	0
BRD-K10671814__sulfaphenazole__trt_cp	154	2	0.0550905	0.914615	1.36974	0	0
BRD-K29905972__S1005__trt_cp	62	2	0.0343362	0.915304	1.37416	0	0
BRD-A47598013__Citalopram hydrobromide__trt_cp	65	2	0.0328579	0.915467	1.37521	0	0
BRD-K31627533__rimexolone__trt_cp	65	2	0.0297034	0.916565	1.38233	0	0
BRD-K81855038__Roxatidine Acetate HCl__trt_cp	12	2	0.0816476	0.91734	1.3874	0	0
BRD-K59632282__quinidine__trt_cp	36	2	0.0508409	0.917522	1.38859	0	0
BRD-K97810537__beclometasone__trt_cp	37	2	0.0383077	0.91802	1.39188	0	0
BRD-A35588707__teniposide__trt_cp	347	2	0.0667526	0.918594	1.39568	0	0
BRD-K10916986__S1527__trt_cp	67	2	0.0523661	0.918626	1.39589	0	0
BRD-A23359898__sibutramine hcl__trt_cp	47	2	0.0391766	0.92027	1.40689	0	0
BRD-A64092382__mexitil__trt_cp	45	2	0.0330318	0.920682	1.40967	0	0
BRD-K89375097__PIRENZEPINE HYDROCHLORIDE__trt_cp	26	2	0.0442308	0.920887	1.41106	0	0
BRD-K22947005__dexbrompheniramine__trt_cp	37	2	0.0456674	0.921012	1.41191	0	0
BRD-K47639036__flavoxate__trt_cp	39	2	0.0385327	0.921069	1.4123	0	0
BRD-K47869605__podophyllotoxin__trt_cp	72	2	0.0728603	0.922467	1.42187	0	0
BRD-K19352500__10h-phenothiazine, 2-chloro-10-[3-(4-methyl-1-piperazinyl)propyl- [cas]__trt_cp	36	2	0.0469957	0.922984	1.42543	0	0
BRD-K30618791__Docetaxel__trt_cp	11	2	0.0798653	0.923346	1.42794	0	0
BRD-K71350836__Butalbital__trt_cp	12	2	0.0580819	0.924846	1.43845	0	0
BRD-K71879491__Retinoic Acid__trt_cp	23	2	0.0707087	0.924866	1.43859	0	0
BRD-K95921201__reserpine__trt_cp	61	2	0.0519099	0.925878	1.44576	0	0
BRD-A11990600__lorazepam__trt_cp	37	2	0.0420492	0.92681	1.45244	0	0
BRD-K36927236__glibenclamide__trt_cp	245	2	0.0204949	0.927471	1.45721	0	0
BRD-K46742498__alosetron hcl__trt_cp	36	2	0.043284	0.928311	1.46332	0	0
BRD-A23723433__Taxol__trt_cp	163	2	0.042224	0.929484	1.47196	0	0
BRD-A44008656__doxylamine__trt_cp	74	2	0.0356739	0.930531	1.47976	0	0
BRD-K80396088__gliquidone__trt_cp	77	2	0.0290655	0.93059	1.4802	0	0
BRD-K05977355__fluconazole__trt_cp	107	2	0.0215234	0.931392	1.48624	0	0
BRD-K63550407__SA1443484__trt_cp	24	2	0.0717786	0.931631	1.48805	0	0
BRD-K90630139__Butenafine Hydrochloride__trt_cp	12	2	0.0648863	0.932709	1.49628	0	0
BRD-K17075857__CHLOROXINE__trt_cp	95	2	0.0449309	0.933222	1.50022	0	0
BRD-K49481516__Galanthamine hydrobromide__trt_cp	12	2	0.0750752	0.935336	1.51675	0	0
BRD-K18910433__17b-estradiol__trt_cp	130	2	0.0430511	0.935491	1.51799	0	0
BRD-K32318651__acyclovir__trt_cp	52	2	0.0564531	0.93652	1.5262	0	0
BRD-A47494775__Dipivefrin hydrochloride__trt_cp	65	2	0.0350979	0.937853	1.537	0	0
BRD-A76528577__Vincristine sulfate__trt_cp	26	2	0.0677504	0.938938	1.54592	0	0
BRD-A29734509__disopyramide__trt_cp	47	2	0.0524351	0.939532	1.55086	0	0
BRD-A04553218__DEXCHLORPHENIRAMINE MALEATE__trt_cp	82	2	0.0307326	0.9404	1.55814	0	0
BRD-A74980173__gatifloxacin__trt_cp	50	2	0.0564932	0.941235	1.56522	0	0
BRD-K37848908__ceforanide__trt_cp	64	2	0.0341397	0.942445	1.57564	0	0
BRD-A79981887__MIDODRINE HYDROCHLORIDE__trt_cp	57	2	0.0327413	0.942504	1.57615	0	0
BRD-K82255054__propofol__trt_cp	73	2	0.0292832	0.942684	1.57771	0	0
BRD-A32161980__H-5832__trt_cp	63	2	0.046771	0.94302	1.58065	0	0
BRD-K39987650__BISACODYL__trt_cp	93	2	0.0540619	0.943546	1.58526	0	0
BRD-K97181089__3,5-diamino-N-carbamimidoyl-6-chloropyrazine-2-carboxamide KAJ-25__trt_cp	57	2	0.04906	0.943579	1.58555	0	0
BRD-K44273375__Tolnaftate__trt_cp	10	2	0.110159	0.943677	1.58641	0	0
BRD-K77695569__thiabendazole__trt_cp	71	2	0.0301407	0.945101	1.5991	0	0
BRD-K32318651__SA59754__trt_cp	24	2	0.0625802	0.945102	1.59911	0	0
BRD-K82795137__loratadine__trt_cp	49	2	0.0484978	0.945903	1.60637	0	0
BRD-A55962179__omeprazole__trt_cp	122	2	0.0249175	0.94595	1.6068	0	0
BRD-K28307902__FLUTAMIDE__trt_cp	369	2	0.0275583	0.945957	1.60686	0	0
BRD-A10070317__inderal__trt_cp	44	2	0.0519781	0.946199	1.60906	0	0
BRD-K20141153__atomoxetine__trt_cp	24	2	0.0675527	0.946377	1.6107	0	0
BRD-A00546892__BIPERIDEN__trt_cp	82	2	0.0257928	0.9476	1.62202	0	0
BRD-K92049597__triamterene__trt_cp	307	2	0.0424857	0.948429	1.62981	0	0
BRD-K35960502__niclosamide__trt_cp	404	2	0.0676259	0.948964	1.63489	0	0
BRD-A23072235__PHENIRAMINE MALEATE__trt_cp	39	2	0.0516279	0.949305	1.63816	0	0
BRD-K92778217__mefenamic-acid__trt_cp	160	2	0.0604742	0.949365	1.63873	0	0
BRD-A88208128__tetracycline hydrochloride__trt_cp	27	2	0.0551741	0.950471	1.64943	0	0
BRD-K08206212__S1252__trt_cp	63	2	0.0436616	0.952463	1.66921	0	0
BRD-K02867583__Minaprine dihydrochloride__trt_cp	10	2	0.0822353	0.952537	1.66997	0	0
BRD-K98490050__AMSACRINE__trt_cp	76	2	0.0948039	0.952561	1.67021	0	0
BRD-K72166146__dihydroergotamine__trt_cp	39	2	0.0439839	0.952952	1.67417	0	0
BRD-K62200014__anagrelide hcl__trt_cp	37	2	0.053713	0.953128	1.67597	0	0
BRD-A19633847__PERHEXILINE MALEATE__trt_cp	176	2	0.0764831	0.954248	1.68751	0	0
BRD-K71125014__Sulfadimethoxine__trt_cp	10	2	0.118982	0.954552	1.69069	0	0
BRD-K89210380__biotin__trt_cp	71	2	0.0412537	0.954569	1.69087	0	0
BRD-K12513978__FENBUFEN__trt_cp	93	2	0.0270379	0.955284	1.6984	0	0
BRD-K17561142__Amiodarone.HCl__trt_cp	18	2	0.129025	0.955636	1.70214	0	0
BRD-A54596827__SOLIFENACIN SUCCINATE__trt_cp	53	2	0.0405922	0.955802	1.70392	0	0
BRD-A48430263__pioglitazone hcl__trt_cp	37	2	0.070065	0.955824	1.70415	0	0
BRD-K61250553__Loperamide hydrochloride__trt_cp	199	2	0.0517755	0.956122	1.70736	0	0
BRD-K69608737__TACROLIMUS__trt_cp	82	2	0.0446384	0.956209	1.70829	0	0
BRD-K79254416__5-Aza-2-deoxycytidine(Decitabine)__trt_cp	23	2	0.0631471	0.956899	1.71578	0	0
BRD-K10852020__tolcapone__trt_cp	69	2	0.0466496	0.957176	1.71881	0	0
BRD-K52989797__anafranil__trt_cp	42	2	0.0565263	0.958136	1.72946	0	0
BRD-K18855837__PZ0004__trt_cp	61	2	0.0472025	0.958241	1.73063	0	0
BRD-K57033106__TRIPELENNAMINE CITRATE__trt_cp	27	2	0.0668895	0.958554	1.73415	0	0
BRD-K30649484__mafenide__trt_cp	24	2	0.0914315	0.958708	1.73588	0	0
BRD-A48570745__ivermectin__trt_cp	58	2	0.0657299	0.95884	1.73738	0	0
BRD-K24844714__5-FLUOROURACIL;51-21-8__trt_cp	105	2	0.0607438	0.958983	1.73901	0	0
BRD-K38003476__clocortolone__trt_cp	38	2	0.0515907	0.959375	1.74348	0	0
BRD-K46137903__Prednicarbate__trt_cp	77	2	0.0414809	0.959514	1.74508	0	0
BRD-K25394294__OXAPROZIN__trt_cp	167	2	0.0242606	0.959921	1.74977	0	0
BRD-K15108141__Gemcitabine Hydrochloride__trt_cp	107	2	0.0881891	0.960191	1.7529	0	0
BRD-K28029915__dolasetron__trt_cp	48	2	0.0419766	0.960265	1.75376	0	0
BRD-K25650355__PHYSOSTIGMINE SALICYLATE__trt_cp	47	2	0.0522995	0.960362	1.75491	0	0
BRD-K50720187__F8927__trt_cp	65	2	0.0437958	0.960422	1.7556	0	0
BRD-K97181089__amiloride__trt_cp	37	2	0.0463582	0.96049	1.7564	0	0
BRD-A72988804__Tiaprofenic acid__trt_cp	65	2	0.0441257	0.960508	1.75661	0	0
BRD-K24616672__procaine__trt_cp	144	2	0.0808283	0.960611	1.75783	0	0
BRD-K04196797__Oxcarbazepine__trt_cp	12	2	0.0847672	0.960682	1.75866	0	0
BRD-K76674262__homoharringtonine__trt_cp	182	2	0.131254	0.960686	1.75871	0	0
BRD-K20338176__cefaclor__trt_cp	46	2	0.046515	0.96069	1.75875	0	0
BRD-K15916496__clotrimazole__trt_cp	47	2	0.0554178	0.960822	1.76031	0	0
BRD-A62434282__goserelin__trt_cp	48	2	0.0538539	0.961789	1.77184	0	0
BRD-K79199004__Stanozolol__trt_cp	12	2	0.0773378	0.962284	1.77783	0	0
BRD-A97739905__ketoprofen__trt_cp	71	2	0.0386147	0.962364	1.7788	0	0
BRD-A55913614__primaquine__trt_cp	35	2	0.0557129	0.96244	1.77973	0	0
BRD-K79131256__albendazole__trt_cp	162	2	0.0481825	0.962529	1.78082	0	0
BRD-K51465424__Ritodrine hydrochloride__trt_cp	53	2	0.0411047	0.962722	1.78319	0	0
BRD-A45543382__Metrizamide__trt_cp	65	2	0.0394868	0.962767	1.78373	0	0
BRD-A20794617__Vancomycin hydrochloride__trt_cp	12	2	0.0847196	0.962991	1.7865	0	0
BRD-K22429181__BL-008__trt_cp	62	2	0.0677971	0.96419	1.80153	0	0
BRD-K28936863__ketotifen__trt_cp	85	2	0.0425765	0.964273	1.80258	0	0
BRD-A62428732__Hydroxyzine dihydrochloride__trt_cp	10	2	0.0825862	0.964692	1.80793	0	0
BRD-K27721098__clopidogrel__trt_cp	41	2	0.0882315	0.964756	1.80876	0	0
BRD-K23204545__myleran__trt_cp	27	2	0.0616449	0.964903	1.81066	0	0
BRD-K95309561__dienestrol__trt_cp	373	2	0.0328767	0.965885	1.82348	0	0
BRD-K89839824__raltitrexed__trt_cp	49	2	0.0573951	0.965987	1.82483	0	0
BRD-K79759585__SA59772__trt_cp	39	2	0.129198	0.966506	1.83176	0	0
BRD-K34411947__Streptozotocin__trt_cp	11	2	0.108471	0.966627	1.83338	0	0
BRD-K70327167__Suramin Na__trt_cp	23	2	0.0920641	0.968148	1.85425	0	0
BRD-K24053527__dextromethorphan__trt_cp	39	2	0.0591989	0.96817	1.85456	0	0
BRD-A26334849__PROPAFENONE HYDROCHLORIDE__trt_cp	38	2	0.04967	0.968354	1.85713	0	0
BRD-K39339537__mepirizole__trt_cp	47	2	0.0555774	0.96867	1.86159	0	0
BRD-A18605525__Hexetidine__trt_cp	12	2	0.097471	0.968683	1.86179	0	0
BRD-K71696703__Triflusal__trt_cp	12	2	0.0870088	0.969591	1.87482	0	0
BRD-A53576514__Orphenadrine hydrochloride__trt_cp	10	2	0.107308	0.969671	1.87598	0	0
BRD-K53857191__risperidone__trt_cp	143	2	0.0293831	0.970017	1.88104	0	0
BRD-K89125793__tinidazole__trt_cp	61	2	0.0436362	0.970113	1.88246	0	0
BRD-K08806317__Timolol maleate salt__trt_cp	38	2	0.0487042	0.970497	1.88814	0	0
BRD-K07220430__cinnarizine__trt_cp	70	2	0.0466679	0.970939	1.89478	0	0
BRD-K60640630__mometasone__trt_cp	39	2	0.0645732	0.972176	1.91378	0	0
BRD-K08252256__benzeneacetic acid, 2-[(2,6-dichlorophenyl)amino]-, monosodium salt [cas]__trt_cp	37	2	0.059797	0.972302	1.91575	0	0
BRD-K52256627__KDM-055__trt_cp	16	2	0.0982637	0.97292	1.92555	0	0
BRD-K91290917__amodiaquine__trt_cp	23	2	0.0926148	0.973293	1.93156	0	0
BRD-A42571354__cetirizine__trt_cp	82	2	0.0365697	0.973365	1.93272	0	0
BRD-K23566484__nilutamide__trt_cp	72	2	0.0399292	0.973619	1.93687	0	0
BRD-K32821942__Azathioprine;446-86-6__trt_cp	57	2	0.0667843	0.97388	1.94115	0	0
BRD-K38775274__EI-126__trt_cp	65	2	0.0518175	0.975454	1.96779	0	0
BRD-A85648045__vinblastine__trt_cp	26	2	0.106015	0.975607	1.97045	0	0
BRD-K60237333__niacin__trt_cp	35	2	0.0899601	0.975797	1.97379	0	0
BRD-K53737926__amitryptiline__trt_cp	137	2	0.0617282	0.975847	1.97467	0	0
BRD-K84175871__PSEUDOEPHEDRINE HYDROCHLORIDE__trt_cp	33	2	0.0608308	0.976045	1.97817	0	0
BRD-K86882815__cabergoline__trt_cp	71	2	0.0577524	0.976059	1.97842	0	0
BRD-K21283037__Riluzole [2-Amino-6-(trifluoromethoxy)benzothiazoles]__trt_cp	21	2	0.124477	0.976591	1.98795	0	0
BRD-K63430059__SA36479__trt_cp	24	2	0.0928138	0.976626	1.98857	0	0
BRD-K81418486__VORINOSTAT__trt_poscon	2575	2	0.108978	0.976684	1.98962	0	0
BRD-A77291778__cyclopentolate__trt_cp	37	2	0.05379	0.977412	2.00301	0	0
BRD-K62310379__Fluticasone propionate__trt_cp	33	2	0.0716461	0.978168	2.01731	0	0
BRD-A34462049__tigecycline__trt_cp	385	2	0.0481235	0.978452	2.02278	0	0
BRD-K30097969__itavastatin ca__trt_cp	46	2	0.108957	0.978682	2.02727	0	0
BRD-K77695569__tiabendazole__trt_cp	48	2	0.0487565	0.978984	2.0332	0	0
BRD-K32164935__SA59353__trt_cp	24	2	0.083788	0.979195	2.03741	0	0
BRD-A21858158__PRAZIQUANTEL__trt_cp	91	2	0.050614	0.979461	2.04274	0	0
BRD-K20075662__betazole__trt_cp	143	2	0.10377	0.979467	2.04287	0	0
BRD-A04553218__chlorpheniramine__trt_cp	36	2	0.0690561	0.979923	2.05216	0	0
BRD-A73368467__FEXOFENADINE HYDROCHLORIDE__trt_cp	47	2	0.0474386	0.980215	2.0582	0	0
BRD-K39339537__epirizole__trt_cp	217	2	0.0707355	0.980306	2.0601	0	0
BRD-K82562631__tolmetin__trt_cp	35	2	0.0613207	0.981836	2.09323	0	0
BRD-K51095933__Estropipate__trt_cp	52	2	0.0643154	0.982808	2.11555	0	0
BRD-K41410256__balsalazide__trt_cp	46	2	0.0630045	0.983539	2.13302	0	0
BRD-K78126613__menadione__trt_cp	364	2	0.0566353	0.983702	2.13701	0	0
BRD-K15933101__Ropinirole HCl__trt_cp	12	2	0.0946682	0.98449	2.15682	0	0
BRD-K02404261__CAFFEINE__trt_cp	116	2	0.038349	0.98474	2.16327	0	0
BRD-A47564106__(+_-)-Tetrabenazine__trt_cp	24	2	0.0759008	0.984741	2.1633	0	0
BRD-A40639672__ketorolac__trt_cp	71	2	0.0574738	0.984842	2.16594	0	0
BRD-K48970916__danazol__trt_cp	114	2	0.0454491	0.985074	2.17205	0	0
BRD-K90553655__Testosterone propionate__trt_cp	29	2	0.0820458	0.985274	2.17737	0	0
BRD-K76205745__Losartan Potassium__trt_cp	173	2	0.0466223	0.985799	2.19169	0	0
BRD-K33240821__AMD3100__trt_cp	23	2	0.090775	0.986189	2.20261	0	0
BRD-K28849549__5-amino-2-hydroxy-benzoic acid__trt_cp	37	2	0.0664093	0.986204	2.20303	0	0
BRD-K45542189__diethylcarbamazine__trt_cp	39	2	0.0618876	0.986306	2.20596	0	0
BRD-K67261995__adipiodone__trt_cp	38	2	0.0700966	0.986446	2.20995	0	0
BRD-K96319534__PHENTERMINE__trt_cp	83	2	0.0388788	0.987188	2.23185	0	0
BRD-K71059170__cefixime__trt_cp	60	2	0.0867803	0.987547	2.24285	0	0
BRD-K29582115__Z2777__trt_cp	65	2	0.0642884	0.987983	2.25659	0	0
BRD-K79092138__NITROFURAZONE__trt_cp	52	2	0.070506	0.988019	2.25774	0	0
BRD-K32830106__GUANFACINE__trt_cp	83	2	0.0449377	0.988254	2.26533	0	0
BRD-K54314721__zolmitriptan__trt_cp	112	2	0.0348294	0.988261	2.26558	0	0
BRD-K67783091__HALOPERIDOL__trt_cp	111	2	0.0416612	0.98924	2.29874	0	0
BRD-K93460210__lamotrigine__trt_cp	102	2	0.0444166	0.98958	2.31088	0	0
BRD-K91601245__6-mercaptopurine monohydrate__trt_cp	26	2	0.0898265	0.989675	2.31432	0	0
BRD-K46937689__ANTIPYRINE__trt_cp	56	2	0.0502098	0.989688	2.31479	0	0
BRD-K04412738__tramadol__trt_cp	44	2	0.0761428	0.990149	2.33199	0	0
BRD-K88172511__naltrexone__trt_cp	43	2	0.0682832	0.990242	2.33554	0	0
BRD-K57222227__INDOMETHACIN__trt_cp	98	2	0.0458245	0.99041	2.34202	0	0
BRD-K35586044__Yohimbine hydrochloride__trt_cp	53	2	0.0540971	0.990535	2.3469	0	0
BRD-K57569181__Pentoxifylline__trt_cp	218	2	0.051166	0.990611	2.34991	0	0
BRD-K28143534__cyproheptadine__trt_cp	48	2	0.094451	0.990624	2.35041	0	0
BRD-K20168442__vecuronium__trt_cp	49	2	0.0578841	0.991011	2.36607	0	0
BRD-A51714012__VENLAFAXINE__trt_cp	95	2	0.0442826	0.991241	2.37564	0	0
BRD-A90131694__alclometasone__trt_cp	36	2	0.0707491	0.991299	2.37809	0	0
BRD-K70778732__trazodone__trt_cp	74	2	0.0529224	0.991299	2.3781	0	0
BRD-A07440155__LABETALOL HYDROCHLORIDE__trt_cp	93	2	0.0413288	0.991705	2.39567	0	0
BRD-K62736196__guanabenz__trt_cp	37	2	0.0703463	0.991838	2.4016	0	0
BRD-K52662033__lidocaine__trt_cp	73	2	0.0544754	0.991841	2.40172	0	0
BRD-K56851771__MDV3100__trt_cp	174	2	0.0429011	0.992416	2.42833	0	0
BRD-K70511574__S1485__trt_cp	63	2	0.0637043	0.99265	2.43967	0	0
BRD-K91699951__benzonatate__trt_cp	234	2	0.0607282	0.992653	2.43982	0	0
BRD-A23723433__paclitaxel__trt_cp	48	2	0.0994351	0.992755	2.4449	0	0
BRD-K73838513__S1260__trt_cp	65	2	0.0608911	0.992806	2.44745	0	0
BRD-K92073408__norethisterone__trt_cp	37	2	0.0713126	0.993087	2.46173	0	0
BRD-A65449987__flunisolide__trt_cp	63	2	0.065836	0.993263	2.47098	0	0
BRD-K30697463__desoximetasone__trt_cp	46	2	0.0659532	0.993269	2.4713	0	0
BRD-K59753975__vindesine__trt_cp	34	2	0.101215	0.99399	2.51154	0	0
BRD-K23478508__digoxin__trt_cp	60	2	0.175057	0.995206	2.59034	0	0
BRD-K38436528__imipramine__trt_cp	138	2	0.0825387	0.995317	2.59837	0	0
BRD-K27853494__Phenylpropanolamine hydrochloride__trt_cp	7	2	0.201917	0.995317	2.59838	0	0
BRD-K52459643__prostaglandin-e1__trt_cp	39	2	0.0811319	0.99533	2.59937	0	0
BRD-K89046952__ciclacillin__trt_cp	38	2	0.0699684	0.995958	2.64856	0	0
BRD-K36862742__hydro-flumethiazide__trt_cp	141	2	0.107228	0.996074	2.65839	0	0
BRD-K97530723__melatonin__trt_cp	120	2	0.0818866	0.996204	2.66969	0	0
BRD-K49111258__prazosin__trt_cp	73	2	0.052515	0.996221	2.67117	0	0
BRD-K70505054__ranitidine__trt_cp	63	2	0.0674813	0.996266	2.67525	0	0
BRD-K60511616__pravastatin__trt_cp	99	2	0.0467932	0.996596	2.70611	0	0
BRD-A79981887__midodrine__trt_cp	36	2	0.0739624	0.996692	2.71553	0	0
BRD-A61154809__Gliclazide__trt_cp	11	2	0.156687	0.996703	2.7167	0	0
BRD-K64994968__progesterone__trt_cp	122	2	0.0512316	0.996882	2.73513	0	0
BRD-K88510285__bortezomib__trt_cp	23	2	0.251303	0.996948	2.74211	0	0
BRD-A19661776__mianserin__trt_cp	35	2	0.074097	0.997011	2.74894	0	0
BRD-M53001068__Aminophylline__trt_cp	11	2	0.127647	0.997072	2.75572	0	0
BRD-K89375097__pirenzepine__trt_cp	36	2	0.0851527	0.997203	2.77073	0	0
BRD-A67981824__cefotaxime__trt_cp	45	2	0.0945567	0.997207	2.77109	0	0
BRD-K59058747__N-ACETYL-L-CYSTEINE__trt_cp	108	2	0.0929606	0.997237	2.77464	0	0
BRD-A00827783__diprophylline__trt_cp	154	2	0.124759	0.997268	2.77832	0	0
BRD-K88510285__B675700.cdx__trt_cp	161	2	0.176399	0.997377	2.79157	0	0
BRD-K08547377__irinotecan__trt_cp	37	2	0.133237	0.997383	2.79228	0	0
BRD-K70330367__AMANTADINE HYDROCHLORIDE__trt_cp	27	2	0.13558	0.997399	2.79429	0	0
BRD-K85090592__Pilocarpine nitrate__trt_cp	12	2	0.126539	0.997409	2.79547	0	0
BRD-K00259736__SA38604__trt_cp	24	2	0.178963	0.997454	2.80119	0	0
BRD-K46211610__TOLAZOLINE HYDROCHLORIDE__trt_cp	63	2	0.0577659	0.997517	2.80927	0	0
BRD-K45995181__Auranofin__trt_cp	3	2	0.309363	0.997696	2.83322	0	0
BRD-K97799481__Theophylline monohydrate__trt_cp	11	2	0.122652	0.997889	2.86115	0	0
BRD-A91699651__CHLOROQUINE DIPHOSPHATE__trt_cp	225	2	0.0392927	0.997926	2.86661	0	0
BRD-A78322124__dobutamine__trt_cp	37	2	0.0867773	0.99798	2.875	0	0
BRD-K26657438__imiquimod__trt_cp	191	2	0.0416642	0.998007	2.8793	0	0
BRD-K75089421__procainamide__trt_cp	36	2	0.0813103	0.998042	2.88482	0	0
BRD-K51207550__Ethionamide__trt_cp	12	2	0.133124	0.9981	2.89431	0	0
BRD-A70514680__Articaine hydrochloride__trt_cp	63	2	0.0627354	0.998203	2.91179	0	0
BRD-A03623303__METOPROLOL TARTRATE__trt_cp	65	2	0.0646164	0.99829	2.92721	0	0
BRD-A51820102__ECONAZOLE NITRATE__trt_cp	27	2	0.112248	0.998312	2.93132	0	0
BRD-A05186015__amfebutamone hcl__trt_cp	37	2	0.0999678	0.998486	2.96493	0	0
BRD-K77987382__mebendazole__trt_cp	159	2	0.0770276	0.99855	2.97824	0	0
BRD-K09963420__saquinavir__trt_cp	75	2	0.0625657	0.998566	2.98154	0	0
BRD-K75089421__PROCAINAMIDE HYDROCHLORIDE__trt_cp	37	2	0.0802509	0.99858	2.98464	0	0
BRD-K56810756__Fomepizole__trt_cp	12	2	0.15801	0.998604	2.98976	0	0
BRD-A46747628__Ouabain__trt_cp	65	2	0.206065	0.998909	3.06431	0	0
BRD-K75641298__metoclopramide__trt_cp	37	2	0.0830739	0.998963	3.07937	0	0
BRD-A93236127__DIGITOXIN__trt_cp	74	2	0.217144	0.999053	3.10624	0	0
BRD-K23984367__sorafenib__trt_cp	144	2	0.154188	0.999155	3.13995	0	0
BRD-K86595100__chlordiazepoxide__trt_cp	47	2	0.0775605	0.999245	3.17281	0	0
BRD-K75037734__Carbachol__trt_cp	11	2	0.161678	0.999288	3.1898	0	0
BRD-K68507560__dicycloverine__trt_cp	38	2	0.0969614	0.999359	3.21998	0	0
BRD-K43860855__Iobenguane sulfate__trt_cp	38	2	0.133976	0.999361	3.22072	0	0
BRD-A25234499__AMINOGLUTETHIMIDE__trt_cp	129	2	0.0468026	0.999448	3.26249	0	0
BRD-K83597974__pargyline__trt_cp	36	2	0.115078	0.999462	3.26982	0	0
BRD-K26521938__Prostaglandin E2__trt_cp	33	2	0.111396	0.999603	3.35463	0	0
BRD-A14208071__oxyphenonium__trt_cp	46	2	0.0980003	0.999629	3.37368	0	0
BRD-A76528577__vincristine__trt_cp	36	2	0.142349	0.999645	3.38531	0	0
BRD-A81233518__glycopyrrolate__trt_cp	94	2	0.0601254	0.999746	3.4766	0	0
BRD-A47598013__citalopram__trt_cp	82	2	0.0816179	0.999825	3.57491	0	0
BRD-K70301876__escitalopram__trt_cp	85	2	0.0635736	0.999853	3.62119	0	0
BRD-K90553655__testosterone__trt_cp	38	2	0.0930343	0.999883	3.67907	0	0
BRD-K51485625__ritonavir__trt_cp	37	2	0.120704	0.999891	3.69811	0	0
BRD-K47631482__bromhexine__trt_cp	37	2	0.132983	0.999915	3.7591	0	0
BRD-K81418486__BG-1034__trt_cp	22	2	0.299947	0.999924	3.78676	0	0
BRD-K02275692__cefotiam__trt_cp	37	2	0.109961	0.99994	3.84629	0	0
BRD-K01663662__Diphenidol hydrochloride__trt_cp	37	2	0.102237	0.999941	3.84935	0	0
BRD-K26521938__dinoprostone__trt_cp	39	2	0.114622	0.999949	3.88414	0	0
BRD-K63550407__erythromycin__trt_cp	72	2	0.0834139	0.999967	3.99064	0	0
BRD-K50388907__fenofibrate__trt_cp	75	2	0.0911306	0.999981	4.11571	0	0
